# Supplementary material for: High throughput exploration of the oxidation landscape in high entropy alloys
Source: Royal Society of Chemistry journal article supplement (doi:10.1039/d2mh00729k), 2022-01-01
Supplement: d2mh00729k2.zip [file d2mh00729k2.zip]

## Sheet: 300 K
	reaction
oxy
0	Zr1Ti5+Ta1W1+Ta1Mo1+Zr1
0.25	Zr1Ti5+Ti6O1+Ta1W1+Ta1Mo1+Zr1
1	Zr3O1+Ti6O1+Ta1W1+Ta1Mo1+Zr1
6	Zr3O1+Ti6O1+Ti3O1+Ta1W1+Ta1Mo1
6.75	Zr3O1+Ti3O1+Ti2O1+Ta1W1+Ta1Mo1
7.5	Zr3O1+Ti2O1+Ta1W1+Ta1Mo1
7.75	Zr3O1+Zr1O2+Ti2O1+Ta1W1+Ta1Mo1
32.5	Zr1O2+Ti2O1+Ta1W1+Ta1Mo1
32.75	Zr1O2+Ti2O1+Ti1O1+Ta1W1+Ta1Mo1
35	Zr1O2+Ti1O1+Ta1W1+Ta1Mo1
35.25	Zr1O2+Ti2O3+Ti1O1+Ta1W1+Ta1Mo1
37.5	Zr1O2+Ti2O3+Ta1W1+Ta1Mo1
37.75	Zr1O2+Ti2O3+Ta2O5+Ta1W3+Ta1W1+Ta1Mo1
54.25	Zr1O2+Ti2O3+Ta2O5+Ta1W3+Ta1Mo1
54.5	Ta1Mo2W1+Zr1O2+Ti2O3+Ta2O5+Ta1W3+Ta1Mo1
62.5	Ta1Mo2W1+Zr1O2+Ti2O3+Ta2O5+Ta1W3
62.75	Ta1Mo2W1+Zr1O2+Ti2O3+Ta2O5+Ta1W3+Mo1W3
72.5	Ta1Mo2W1+Zr1O2+Ti2O3+Ta2O5+Mo1W3
72.75	Ta1Mo2W1+Zr1O2+Ti2O3+Ta2O5+Mo1W3+Mo1W1
75	Zr1O2+Ti2O3+Ta2O5+Mo1W3+Mo1W1
75.25	Zr1O2+Ti3O5+Ti2O3+Ta2O5+Mo1W3+Mo1W1
76	Zr1O2+Ti3O5+Ti1O2+Ta2O5+Mo1W3+Mo1W1
77.5	Zr1O2+Ti1O2+Ta2O5+Mo1W3+Mo1W1
77.75	Zr1O2+W1O3+Ti1O2+Ta2O5+Mo1W3+Mo1W1
92.5	Zr1O2+W1O3+Ti1O2+Ta2O5+Mo1W1
92.75	Zr1O2+W1O3+Ti1O2+Ta2O5+Mo3W1+Mo1W1
102.5	Zr1O2+W1O3+Ti1O2+Ta2O5+Mo3W1
102.75	Zr1O2+W1O3+Ti1O2+Ta2O5+Mo3W1+Mo1O2

## Sheet: 400 K
	reaction
oxy
0	Zr1Ti5+Ta1W1+Ta1Mo1+Zr1
0.25	Zr1Ti5+Ti6O1+Ta1W1+Ta1Mo1+Zr1
1	Ti6O1+Ti3O1+Ta1W1+Ta1Mo1+Zr1
1.75	Zr3O1+Ti3O1+Ta1W1+Ta1Mo1+Zr1
6.75	Zr3O1+Ti3O1+Ti2O1+Ta1W1+Ta1Mo1
7.5	Zr3O1+Ti2O1+Ta1W1+Ta1Mo1
7.75	Zr3O1+Zr1O2+Ti2O1+Ta1W1+Ta1Mo1
32.5	Zr1O2+Ti2O1+Ta1W1+Ta1Mo1
32.75	Zr1O2+Ti2O1+Ti1O1+Ta1W1+Ta1Mo1
35	Zr1O2+Ti1O1+Ta1W1+Ta1Mo1
35.25	Zr1O2+Ti2O3+Ti1O1+Ta1W1+Ta1Mo1
37.5	Zr1O2+Ti2O3+Ta1W1+Ta1Mo1
37.75	Zr1O2+Ti2O3+Ta2O5+Ta1W3+Ta1W1+Ta1Mo1
54.25	Zr1O2+Ti2O3+Ta2O5+Ta1W3+Ta1Mo1
54.5	Ta1Mo2W1+Zr1O2+Ti2O3+Ta2O5+Ta1W3+Ta1Mo1
62.5	Ta1Mo2W1+Zr1O2+Ti2O3+Ta2O5+Ta1W3
62.75	Ta1Mo2W1+Zr1O2+Ti2O3+Ta2O5+Ta1W3+Mo1W1
70.75	Zr1O2+Ti2O3+Ta2O5+Ta1W3+Mo1W1
71	Zr1O2+Ti2O3+Ta2O5+Ta1W3+Mo1W3+Mo1W1
75	Zr1O2+Ti2O3+Ta2O5+Mo1W3+Mo1W1
75.25	Zr1O2+Ti3O5+Ti2O3+Ta2O5+Mo1W3+Mo1W1
76	Zr1O2+Ti6O11+Ti3O5+Ta2O5+Mo1W3+Mo1W1
76.75	Zr1O2+Ti6O11+Ti1O2+Ta2O5+Mo1W3+Mo1W1
77.5	Zr1O2+Ti1O2+Ta2O5+Mo1W3+Mo1W1
77.75	Zr1O2+W1O3+Ti1O2+Ta2O5+Mo1W3+Mo1W1
92.5	Zr1O2+W1O3+Ti1O2+Ta2O5+Mo1W1
92.75	Zr1O2+W1O3+Ti1O2+Ta2O5+Mo3W1+Mo1W1
102.5	Zr1O2+W1O3+Ti1O2+Ta2O5+Mo3W1
102.75	Zr1O2+W1O3+Ti1O2+Ta2O5+Mo3W1+Mo1O2

## Sheet: 500 K
	reaction
oxy
0	Ta1W1+Ta1Mo1+Zr1+Ti1
0.25	Ti6O1+Ta1W1+Ta1Mo1+Zr1+Ti1
1	Ti6O1+Ti3O1+Ta1W1+Ta1Mo1+Zr1
1.75	Zr3O1+Ti3O1+Ta1W1+Ta1Mo1+Zr1
6.75	Zr3O1+Ti3O1+Ti2O1+Ta1W1+Ta1Mo1
7.5	Zr3O1+Ti2O1+Ta1W1+Ta1Mo1
7.75	Zr3O1+Zr1O2+Ti2O1+Ta1W1+Ta1Mo1
32.5	Zr1O2+Ti2O1+Ta1W1+Ta1Mo1
32.75	Zr1O2+Ti2O1+Ti1O1+Ta1W1+Ta1Mo1
35	Zr1O2+Ti1O1+Ta1W1+Ta1Mo1
35.25	Zr1O2+Ti2O3+Ti1O1+Ta1W1+Ta1Mo1
37.5	Zr1O2+Ti2O3+Ta1W1+Ta1Mo1
37.75	Zr1O2+Ti2O3+Ta2O5+Ta1W3+Ta1W1+Ta1Mo1
54.25	Zr1O2+Ti2O3+Ta2O5+Ta1W3+Ta1Mo1
54.5	Ta1Mo2W1+Zr1O2+Ti2O3+Ta2O5+Ta1W3+Ta1Mo1
62.5	Ta1Mo2W1+Zr1O2+Ti2O3+Ta2O5+Ta1W3
62.75	Ta1Mo2W1+Zr1O2+Ti2O3+Ta2O5+Ta1W3+Mo1W1
70.75	Zr1O2+Ti2O3+Ta2O5+Ta1W3+Mo1W1
71	Zr1O2+Ti2O3+Ta2O5+Ta1W3+Mo1W3+Mo1W1
75	Zr1O2+Ti2O3+Ta2O5+Mo1W3+Mo1W1
75.25	Zr1O2+Ti3O5+Ti2O3+Ta2O5+Mo1W3+Mo1W1
76	Zr1O2+Ti6O11+Ti3O5+Ta2O5+Mo1W3+Mo1W1
76.75	Zr1O2+Ti6O11+Ti1O2+Ta2O5+Mo1W3+Mo1W1
77.5	Zr1O2+Ti1O2+Ta2O5+Mo1W3+Mo1W1
77.75	Zr1O2+W1O3+Ti1O2+Ta2O5+Mo1W3+Mo1W1
92.5	Zr1O2+W1O3+Ti1O2+Ta2O5+Mo1W1
92.75	Zr1O2+W1O3+Ti1O2+Ta2O5+Mo3W1+Mo1W1
102.5	Zr1O2+W1O3+Ti1O2+Ta2O5+Mo3W1
102.75	Zr1O2+W1O3+Ti1O2+Ta2O5+Mo3W1+Mo1O2

## Sheet: 600 K
	reaction
oxy
0	Ta1W1+Ta1Mo1+Zr1+Ti1
0.25	Ti3O1+Ta1W1+Ta1Mo1+Zr1+Ti1
1.75	Zr3O1+Ti3O1+Ta1W1+Ta1Mo1+Zr1
6.75	Zr3O1+Ti3O1+Ti2O1+Ta1W1+Ta1Mo1
7.5	Zr3O1+Ti2O1+Ta1W1+Ta1Mo1
7.75	Zr3O1+Zr1O2+Ti2O1+Ta1W1+Ta1Mo1
32.5	Zr1O2+Ti2O1+Ta1W1+Ta1Mo1
32.75	Zr1O2+Ti2O1+Ti1O1+Ta1W1+Ta1Mo1
35	Zr1O2+Ti1O1+Ta1W1+Ta1Mo1
35.25	Zr1O2+Ti2O3+Ti1O1+Ta1W1+Ta1Mo1
37.5	Zr1O2+Ti2O3+Ta1W1+Ta1Mo1
37.75	Zr1O2+Ti2O3+Ta2O5+Ta1W3+Ta1W1+Ta1Mo1
54.25	Zr1O2+Ti2O3+Ta2O5+Ta1W3+Ta1Mo1
54.5	Ta1Mo2W1+Zr1O2+Ti2O3+Ta2O5+Ta1W3+Ta1Mo1
62.5	Ta1Mo2W1+Zr1O2+Ti2O3+Ta2O5+Ta1W3
62.75	Ta1Mo2W1+Zr1O2+Ti2O3+Ta2O5+Ta1W3+Mo3W1
68	Zr1O2+Ti2O3+Ta2O5+Ta1W3+Mo3W1
68.25	Zr1O2+Ti2O3+Ta2O5+Ta1W3+Mo3W1+Mo1W1
71	Zr1O2+Ti2O3+Ta2O5+Ta1W3+Mo1W3+Mo1W1
75	Zr1O2+Ti2O3+Ta2O5+Mo1W3+Mo1W1
75.25	Zr1O2+Ti3O5+Ti2O3+Ta2O5+Mo1W3+Mo1W1
76	Zr1O2+Ti6O11+Ti3O5+Ta2O5+Mo1W3+Mo1W1
76.75	Zr1O2+Ti6O11+Ti1O2+Ta2O5+Mo1W3+Mo1W1
77.5	Zr1O2+Ti1O2+Ta2O5+Mo1W3+Mo1W1
77.75	Zr1O2+W1O3+Ti1O2+Ta2O5+Mo1W3+Mo1W1
92.5	Zr1O2+W1O3+Ti1O2+Ta2O5+Mo1W1
92.75	Zr1O2+W1O3+Ti1O2+Ta2O5+Mo3W1+Mo1W1
102.5	Zr1O2+W1O3+Ti1O2+Ta2O5+Mo3W1
102.75	Zr1O2+W1O3+Ti1O2+Ta2O5+Mo3W1+Mo1O2

## Sheet: 700 K
	reaction
oxy
0	Ta1W1+Ta1Mo1+Zr1+Ti1
0.25	Ti3O1+Ta1W1+Ta1Mo1+Zr1+Ti1
1.75	Zr3O1+Ti3O1+Ta1W1+Ta1Mo1+Zr1
6.75	Zr3O1+Ti3O1+Ti2O1+Ta1W1+Ta1Mo1
7.5	Zr3O1+Ti2O1+Ta1W1+Ta1Mo1
7.75	Zr3O1+Zr1O2+Ti2O1+Ta1W1+Ta1Mo1
32.5	Zr1O2+Ti2O1+Ta1W1+Ta1Mo1
32.75	Zr1O2+Ti2O1+Ti1O1+Ta1W1+Ta1Mo1
35	Zr1O2+Ti1O1+Ta1W1+Ta1Mo1
35.25	Zr1O2+Ti2O3+Ti1O1+Ta1W1+Ta1Mo1
37.5	Zr1O2+Ti2O3+Ta1W1+Ta1Mo1
37.75	Zr1O2+Ti2O3+Ta2O5+Ta1W3+Ta1W1+Ta1Mo1
54.25	Zr1O2+Ti2O3+Ta2O5+Ta1W3+Ta1Mo1
54.5	Ta1Mo2W1+Zr1O2+Ti2O3+Ta2O5+Ta1W3+Ta1Mo1
62.5	Ta1Mo2W1+Zr1O2+Ti2O3+Ta2O5+Ta1W3
62.75	Ta1Mo2W1+Zr1O2+Ti2O3+Ta2O5+Ta1W3+Mo3W1
68	Zr1O2+Ti2O3+Ta2O5+Ta1W3+Mo3W1
68.25	Zr1O2+Ti2O3+Ta2O5+Ta1W3+Mo3W1+Mo1W1
71	Zr1O2+Ti3O5+Ti2O3+Ta2O5+Ta1W3+Mo1W1
71.75	Zr1O2+Ti3O5+Ta2O5+Ta1W3+Mo1W3+Mo1W1
76	Zr1O2+Ti6O11+Ti3O5+Ta2O5+Mo1W3+Mo1W1
76.75	Zr1O2+Ti6O11+Ti1O2+Ta2O5+Mo1W3+Mo1W1
77.5	Zr1O2+Ti1O2+Ta2O5+Mo1W3+Mo1W1
77.75	Zr1O2+W1O3+Ti1O2+Ta2O5+Mo1W3+Mo1W1
92.5	Zr1O2+W1O3+Ti1O2+Ta2O5+Mo1W1
92.75	Zr1O2+W1O3+Ti1O2+Ta2O5+Mo3W1+Mo1W1
102.5	Zr1O2+W1O3+Ti1O2+Ta2O5+Mo3W1
102.75	Zr1O2+W1O3+Ti1O2+Ta2O5+Mo3W1+Mo1
107.5	Zr1O2+W1O3+Ti1O2+Ta2O5+Mo1
107.75	Zr1O2+W1O3+Ti1O2+Ta2O5+Mo1O2+Mo1

## Sheet: 800 K
	reaction
oxy
0	Ta1W1+Ta1Mo1+Zr1+Ti1
0.25	Ti3O1+Ta1W1+Ta1Mo1+Zr1+Ti1
1.75	Ti3O1+Ti2O1+Ta1W1+Ta1Mo1+Zr1
2.5	Ti2O1+Ta1W1+Ta1Mo1+Zr1
2.75	Zr1O2+Ti2O1+Ta1W1+Ta1Mo1+Zr1
32.5	Zr1O2+Ti2O1+Ta1W1+Ta1Mo1
32.75	Zr1O2+Ti2O1+Ti1O1+Ta1W1+Ta1Mo1
35	Zr1O2+Ti1O1+Ta1W1+Ta1Mo1
35.25	Zr1O2+Ti2O3+Ti1O1+Ta1W1+Ta1Mo1
37.5	Zr1O2+Ti2O3+Ta1W1+Ta1Mo1
37.75	Zr1O2+Ti2O3+Ta2O5+Ta1W3+Ta1W1+Ta1Mo1
54.25	Zr1O2+Ti2O3+Ta2O5+Ta1W3+Ta1Mo1
54.5	Ta1Mo2W1+Zr1O2+Ti2O3+Ta2O5+Ta1W3+Ta1Mo1
62.5	Ta1Mo2W1+Zr1O2+Ti2O3+Ta2O5+Ta1W3
62.75	Ta1Mo2W1+Zr1O2+Ti2O3+Ta2O5+Ta1W3+Mo3W1
68	Zr1O2+Ti2O3+Ta2O5+Ta1W3+Mo3W1
68.25	Zr1O2+Ti3O5+Ti2O3+Ta2O5+Ta1W3+Mo3W1
69	Zr1O2+Ti3O5+Ta2O5+Ta1W3+Mo3W1+Mo1W1
71.75	Zr1O2+Ti3O5+Ta2O5+Ta1W3+Mo1W3+Mo1W1
76	Zr1O2+Ti6O11+Ti3O5+Ta2O5+Mo1W3+Mo1W1
76.75	Zr1O2+Ti6O11+Ti1O2+Ta2O5+Mo1W3+Mo1W1
77.5	Zr1O2+Ti1O2+Ta2O5+Mo1W3+Mo1W1
77.75	Zr1O2+W1O3+Ti1O2+Ta2O5+Mo1W3+Mo1W1
92.5	Zr1O2+W1O3+Ti1O2+Ta2O5+Mo1W1
92.75	Zr1O2+W1O3+Ti1O2+Ta2O5+Mo3W1+Mo1W1
102.5	Zr1O2+W1O3+Ti1O2+Ta2O5+Mo3W1
102.75	Zr1O2+W1O3+Ti1O2+Ta2O5+Mo3W1+Mo1
107.5	Zr1O2+W1O3+Ti1O2+Ta2O5+Mo1
107.75	Zr1O2+W1O3+Ti1O2+Ta2O5+Mo1O2+Mo1

## Sheet: 900 K
	reaction
oxy
0	Mo5Ta15Ti5W10Zr15
0.25	Mo5Ta15Ti5W10Zr15+Zr1O2+Ti2O1+Ta1W1+Ta1Mo1
31.5	Zr1O2+Ti2O1+Ta1W1+Ta1Mo1
32.75	Zr1O2+Ti2O1+Ti1O1+Ta1W1+Ta1Mo1
35	Zr1O2+Ti1O1+Ta1W1+Ta1Mo1
35.25	Zr1O2+Ti2O3+Ti1O1+Ta1W1+Ta1Mo1
37.5	Zr1O2+Ti2O3+Ta1W1+Ta1Mo1
37.75	Zr1O2+Ti2O3+Ta2O5+Ta1W3+Ta1W1+Ta1Mo1
54.25	Zr1O2+Ti2O3+Ta2O5+Ta1W3+Ta1Mo1
54.5	Ta1Mo2W1+Zr1O2+Ti2O3+Ta2O5+Ta1W3+Ta1Mo1
62.5	Ta1Mo2W1+Zr1O2+Ti2O3+Ta2O5+Ta1W3
62.75	Ta1Mo2W1+Zr1O2+Ti2O3+Ta2O5+Ta1W3+Mo3W1
68	Zr1O2+Ti2O3+Ta2O5+Ta1W3+Mo3W1
68.25	Zr1O2+Ti3O5+Ti2O3+Ta2O5+Ta1W3+Mo3W1
69	Zr1O2+Ti3O5+Ta2O5+Ta1W3+Mo3W1+Mo1W1
71.75	Zr1O2+Ti3O5+Ta2O5+Ta1W3+Mo1W3+Mo1W1
76	Zr1O2+Ti6O11+Ti3O5+Ta2O5+Mo1W3+Mo1W1
76.75	Zr1O2+Ti6O11+Ti1O2+Ta2O5+Mo1W3+Mo1W1
77.5	Zr1O2+Ti1O2+Ta2O5+Mo1W3+Mo1W1
77.75	Zr1O2+W1O3+Ti1O2+Ta2O5+Mo1W3+Mo1W1
92.5	Zr1O2+W1O3+Ti1O2+Ta2O5+Mo1W1
92.75	Zr1O2+W1O3+Ti1O2+Ta2O5+Mo3W1+Mo1W1
102.5	Zr1O2+W1O3+Ti1O2+Ta2O5+Mo3W1
102.75	Zr1O2+W1O3+Ti1O2+Ta2O5+Mo3W1+Mo1
107.5	Zr1O2+W1O3+Ti1O2+Ta2O5+Mo1
108	Ta2Mo2O11+Zr1O2+W1O3+Ti1O2+Ta2O5+Mo1

## Sheet: 1000 K
	reaction
oxy
0	Mo5Ta15Ti5W10Zr15
0.25	Mo5Ta15Ti5W10Zr15+Zr1O2+Ti2O1+Ta1W1+Ta1Mo1
31.5	Zr1O2+Ti2O1+Ta1W1+Ta1Mo1
32.75	Zr1O2+Ti2O1+Ti1O1+Ta1W1+Ta1Mo1
35	Zr1O2+Ti1O1+Ta1W1+Ta1Mo1
35.25	Zr1O2+Ti2O3+Ti1O1+Ta1W1+Ta1Mo1
37.5	Zr1O2+Ti2O3+Ta1W1+Ta1Mo1
37.75	Zr1O2+Ti2O3+Ta2O5+Ta1W3+Ta1W1+Ta1Mo1
54.25	Zr1O2+Ti2O3+Ta2O5+Ta1W3+Ta1Mo1
54.5	Ta1Mo2W1+Zr1O2+Ti2O3+Ta2O5+Ta1W3+Ta1Mo1
62.5	Ta1Mo2W1+Zr1O2+Ti2O3+Ta2O5+Ta1W3
62.75	Ta1Mo2W1+Zr1O2+Ti3O5+Ti2O3+Ta2O5+Ta1W3
63.5	Ta1Mo2W1+Zr1O2+Ti3O5+Ta2O5+Ta1W3+Mo3W1
69	Zr1O2+Ti3O5+Ta2O5+Ta1W3+Mo3W1+Mo1W1
71.75	Zr1O2+Ti6O11+Ti3O5+Ta2O5+Ta1W3+Mo1W1
72.5	Zr1O2+Ti6O11+Ta2O5+Ta1W3+Mo1W1
72.75	Zr1O2+Ti6O11+Ta2O5+Ta1W3+Mo1W3+Mo1W1
76.75	Zr1O2+Ti6O11+Ti1O2+Ta2O5+Mo1W3+Mo1W1
77.5	Zr1O2+Ti1O2+Ta2O5+Mo1W3+Mo1W1
77.75	Zr1O2+W1O3+Ti1O2+Ta2O5+Mo1W3+Mo1W1
92.5	Zr1O2+W1O3+Ti1O2+Ta2O5+Mo1W1
92.75	Zr1O2+W1O3+Ti1O2+Ta2O5+Mo3W1+Mo1W1
102.5	Zr1O2+W1O3+Ti1O2+Ta2O5+Mo3W1
102.75	Zr1O2+W1O3+Ti1O2+Ta2O5+Mo3W1+Mo1
107.5	Zr1O2+W1O3+Ti1O2+Ta2O5+Mo1
108	Ta2Mo2O11+Zr1O2+W1O3+Ti1O2+Ta2O5+Mo1

## Sheet: 1100 K
	reaction
oxy
0	Mo5Ta15Ti5W10Zr15
0.25	Mo5Ta15Ti5W10Zr15+Zr1O2+Ti2O1+Ta1W1+Ta1Mo1
31.5	Zr1O2+Ti2O1+Ta1W1+Ta1Mo1
32.75	Zr1O2+Ti2O1+Ti1O1+Ta1W1+Ta1Mo1
35	Zr1O2+Ti1O1+Ta1W1+Ta1Mo1
35.25	Zr1O2+Ti2O3+Ti1O1+Ta1W1+Ta1Mo1
37.5	Zr1O2+Ti2O3+Ta1W1+Ta1Mo1
37.75	Zr1O2+Ti2O3+Ta2O5+Ta1W3+Ta1W1+Ta1Mo1
54.25	Zr1O2+Ti2O3+Ta2O5+Ta1W3+Ta1Mo1
54.5	Ta1Mo2W1+Zr1O2+Ti2O3+Ta2O5+Ta1W3+Ta1Mo1
62.5	Ta1Mo2W1+Zr1O2+Ti2O3+Ta2O5+Ta1W3
62.75	Ta1Mo2W1+Zr1O2+Ti3O5+Ti2O3+Ta2O5+Ta1W3
63.5	Ta1Mo2W1+Zr1O2+Ti3O5+Ta2O5+Ta1W3+Mo3W1
69	Zr1O2+Ti6O11+Ti3O5+Ta2O5+Ta1W3+Mo3W1
69.75	Zr1O2+Ti6O11+Ta2O5+Ta1W3+Mo3W1+Mo1W1
72.5	Zr1O2+Ti6O11+Ta2O5+Ta1W3+Mo1W1
72.75	Zr1O2+Ti6O11+Ta2O5+Ta1W3+Mo1W1+W1
76.75	Zr1O2+Ti6O11+Ti1O2+Ta2O5+Mo1W1+W1
77.5	Zr1O2+Ti1O2+Ta2O5+Mo1W1+W1
77.75	Zr1O2+W1O3+Ti1O2+Ta2O5+Mo1W1+W1
92.5	Zr1O2+W1O3+Ti1O2+Ta2O5+Mo1W1
92.75	Zr1O2+W1O3+Ti1O2+Ta2O5+Mo3W1+Mo1W1
102.5	Zr1O2+W1O3+Ti1O2+Ta2O5+Mo3W1
102.75	Zr1O2+W1O3+Ti1O2+Ta2O5+Mo3W1+Mo1
107.5	Zr1O2+W1O3+Ti1O2+Ta2O5+Mo1
108	Ta2Mo2O11+Zr1O2+W1O3+Ti1O2+Ta2O5+Mo1

## Sheet: 1200 K
	reaction
oxy
0	Mo5Ta15Ti5W10Zr15
0.25	Mo5Ta15Ti5W10Zr15+Zr1O2+Ti2O1+Ta1W1+Ta1Mo1
31.5	Zr1O2+Ti2O1+Ta1W1+Ta1Mo1
32.75	Zr1O2+Ti2O1+Ti1O1+Ta1W1+Ta1Mo1
35	Zr1O2+Ti1O1+Ta1W1+Ta1Mo1
35.25	Zr1O2+Ti2O3+Ti1O1+Ta1W1+Ta1Mo1
37.5	Zr1O2+Ti2O3+Ta1W1+Ta1Mo1
37.75	Zr1O2+Ti2O3+Ta2O5+Ta1W3+Ta1W1+Ta1Mo1
54.25	Zr1O2+Ti2O3+Ta2O5+Ta1W3+Ta1Mo1
54.5	Ta1Mo2W1+Zr1O2+Ti2O3+Ta2O5+Ta1W3+Ta1Mo1
62.5	Ta1Mo2W1+Zr1O2+Ti2O3+Ta2O5+Ta1W3
62.75	Ta1Mo2W1+Zr1O2+Ti3O5+Ti2O3+Ta2O5+Ta1W3
63.5	Ta1Mo2W1+Zr1O2+Ti3O5+Ta2O5+Ta1W3+Mo1
67.5	Zr1O2+Ti3O5+Ta2O5+Ta1W3+Mo1
67.75	Zr1O2+Ti3O5+Ta2O5+Ta1W3+Mo3W1+Mo1
69	Zr1O2+Ti6O11+Ti3O5+Ta2O5+Ta1W3+Mo3W1
69.75	Zr1O2+Ti6O11+Ta2O5+Ta1W3+Mo3W1+Mo1W1
72.5	Zr1O2+Ti6O11+Ta2O5+Ta1W3+Mo1W1
72.75	Zr1O2+Ti6O11+Ta2O5+Ta1W3+Mo1W1+W1
76.75	Zr1O2+Ti6O11+Ti1O2+Ta2O5+Mo1W1+W1
77.5	Zr1O2+Ti1O2+Ta2O5+Mo1W1+W1
77.75	Zr1O2+W1O3+Ti1O2+Ta2O5+Mo1W1+W1
92.5	Zr1O2+W1O3+Ti1O2+Ta2O5+Mo1W1
92.75	Zr1O2+W1O3+Ti1O2+Ta2O5+Mo3W1+Mo1W1
102.5	Zr1O2+W1O3+Ti1O2+Ta2O5+Mo3W1
102.75	Zr1O2+W1O3+Ti1O2+Ta2O5+Mo3W1+Mo1
107.5	Zr1O2+W1O3+Ti1O2+Ta2O5+Mo1
108	Ta2Mo2O11+Zr1O2+W1O3+Ti1O2+Ta2O5+Mo1

[truncated: 8 more sheets: 1300 K, 1400 K, 1500 K, 1600 K, 1700 K, 1800 K, 1900 K, 2000 K]
