# Supplementary material for: High throughput exploration of the oxidation landscape in high entropy alloys
Source: Royal Society of Chemistry journal article supplement (doi:10.1039/d2mh00729k), 2022-01-01
Supplement: d2mh00729k3.zip [file d2mh00729k3.zip]

## Sheet: OQMD BARTEL PREDICTION
formula	energy	dH	300	400	500	600	700	800	900	1000	1100	1200	1300	1400	1500	1600	1700	1800	1900	2000
Mo1	-10.8481	0	0	0	0	0	0	0	0	0	0	0	0	0	0	0	0	0	0	0
O1	-4.84446	0	0	0	0	0	0	0	0	0	0	0	0	0	0	0	0	0	0	0
Ta1	-11.8525	0	0	0	0	0	0	0	0	0	0	0	0	0	0	0	0	0	0	0
Ti1	-7.77564	0	0	0	0	0	0	0	0	0	0	0	0	0	0	0	0	0	0	0
W1	-12.9602	0	0	0	0	0	0	0	0	0	0	0	0	0	0	0	0	0	0	0
Zr1	-8.54717	0	0	0	0	0	0	0	0	0	0	0	0	0	0	0	0	0	0	0
Mo1O1	-8.61155	-0.925856	-0.788455	-0.707099	-0.632179	-0.560332	-0.4899	-0.419975	-0.350026	-0.279726	-0.208866	-0.137312	-0.0649721	0.00821408	0.0822892	0.157283	0.233217	0.310107	0.387967	0.466804
Mo1O2	-8.78635	-2.15479	-1.98103	-1.88781	-1.80146	-1.71855	-1.63735	-1.55692	-1.47669	-1.39632	-1.31557	-1.23431	-1.15243	-1.06987	-0.986577	-0.902518	-0.817671	-0.732019	-0.645549	-0.558254
Mo1O3	-8.26747	-2.16298	-1.97633	-1.87895	-1.78866	-1.70198	-1.61716	-1.53324	-1.44964	-1.366	-1.28208	-1.19773	-1.11285	-1.02736	-0.941226	-0.8544	-0.766862	-0.678595	-0.589587	-0.499829
Mo1W1	-11.9141	-0.00996441	-0.0830674	-0.0710872	-0.0642554	-0.0594716	-0.0552554	-0.050822	-0.0457282	-0.0397109	-0.0326085	-0.024325	-0.0147956	-0.00398413	0.00813401	0.0215716	0.0363364	0.0524331	0.0698628	0.0886266
Mo1W3	-12.4358	-0.00360742	-0.0733935	-0.0603003	-0.0523641	-0.0465003	-0.0412321	-0.0357739	-0.0296799	-0.0226849	-0.0146266	-0.00540894	0.00503227	0.016731	0.0297094	0.0439767	0.0595365	0.0763886	0.0945286	0.113952
Mo2O1	-9.01786	-0.27804	-0.187703	-0.121776	-0.0618498	-0.00463904	0.0514579	0.107307	0.16341	0.220069	0.277477	0.335757	0.39499	0.455231	0.516519	0.578879	0.642332	0.706892	0.772573	0.839385
Mo2O3	-8.95094	-1.89773	-1.73757	-1.64878	-1.56669	-1.48789	-1.41068	-1.33413	-1.2577	-1.18104	-1.10394	-1.02624	-0.947865	-0.868738	-0.788816	-0.708067	-0.62647	-0.544007	-0.460666	-0.376438
Mo2O5	-8.24701	-1.91663	-1.74578	-1.6536	-1.56842	-1.48678	-1.40693	-1.32793	-1.2492	-1.17038	-1.09124	-1.01164	-0.931466	-0.850655	-0.769158	-0.68694	-0.603977	-0.520252	-0.435754	-0.350473
Mo3O1	-8.87598	0.390908	0.457822	0.516072	0.568538	0.618467	0.667433	0.716282	0.765497	0.815372	0.866092	0.91777	0.970487	1.02429	1.07922	1.1353	1.19255	1.25098	1.31061	1.37145
Mo3W1	-11.3778	-0.00164983	-0.0782388	-0.0674278	-0.0617566	-0.0581091	-0.0550013	-0.0516491	-0.0476117	-0.0426284	-0.0365382	-0.0292451	-0.0206839	-0.010816	0.000385554	0.0129371	0.0268506	0.0421357	0.0587988	0.0768465
Mo4O11	-8.23526	-2.02535	-1.84594	-1.75094	-1.66299	-1.57861	-1.49607	-1.4144	-1.33302	-1.25158	-1.16985	-1.08767	-1.00494	-0.921589	-0.83757	-0.752849	-0.667399	-0.581206	-0.494256	-0.406541
Mo4O5	-8.14704	-0.812731	-0.666659	-0.582499	-0.504919	-0.430533	-0.357662	-0.285384	-0.213158	-0.140649	-0.067645	0.00599489	0.0803646	0.155527	0.231526	0.308392	0.386147	0.464809	0.544388	0.624895
Ta1Mo1	-11.5447	-0.19436	-0.251716	-0.234411	-0.222131	-0.211795	-0.20194	-0.1918	-0.180947	-0.169136	-0.156216	-0.142101	-0.126734	-0.110085	-0.0921376	-0.0728913	-0.0523465	-0.0305018	-0.00735614	0.0170918
Ta1Mo3	-11.2165	-0.117279	-0.18567	-0.172089	-0.163586	-0.157054	-0.151019	-0.144705	-0.13768	-0.129692	-0.120585	-0.110268	-0.0986801	-0.0857853	-0.0715611	-0.0559972	-0.0390857	-0.0208186	-0.00118944	0.0198084
Ta1O1	-9.68978	-1.50187	-1.34898	-1.26237	-1.18209	-1.10483	-1.02895	-0.953566	-0.878155	-0.802402	-0.72611	-0.649153	-0.57145	-0.492948	-0.41362	-0.333455	-0.252448	-0.170596	-0.0878976	-0.0043536
Ta1O2	-9.84588	-2.8795	-2.69726	-2.60115	-2.51185	-2.42593	-2.34172	-2.25826	-2.17501	-2.09161	-2.00786	-1.92361	-1.83877	-1.75328	-1.6671	-1.5802	-1.49259	-1.40424	-1.31516	-1.22534
Ta1O3	-7.962	-1.60639	-1.39656	-1.2914	-1.19327	-1.09873	-1.00604	-0.914243	-0.82276	-0.73124	-0.639455	-0.547255	-0.454542	-0.361248	-0.267333	-0.172771	-0.0775465	0.0183516	0.11493	0.212192
Ta1Ti1	-9.76742	0.00787273	-0.0071865	0.0243334	0.0510537	0.0760462	0.100739	0.125869	0.151851	0.178946	0.207341	0.2378	0.270794	0.305072	0.340655	0.37755	0.415763	0.455306	0.496186	0.540768
Ta1Ti2	-9.06198	0.0209012	0.000327865	0.030018	0.0549489	0.0782053	0.101213	0.124702	0.14909	0.174646	0.201572	0.23086	0.263126	0.296692	0.331586	0.367823	0.405419	0.44439	0.484753	0.52966
Ta1Ti3	-8.70109	0.03559	0.0123224	0.0411185	0.0651758	0.087585	0.10977	0.132461	0.156073	0.180879	0.207092	0.235816	0.267739	0.30097	0.33554	0.371469	0.408777	0.447483	0.487608	0.532699
Ta1Ti5	-8.3882	0.00226565	-0.0236818	0.00422528	0.0274136	0.0489805	0.0703484	0.0922447	0.115085	0.139148	0.164652	0.192817	0.224401	0.257302	0.291553	0.327179	0.364204	0.40265	0.442542	0.487821
Ta1W1	-12.5079	-0.101577	-0.197284	-0.192747	-0.193254	-0.195753	-0.198788	-0.201593	-0.203735	-0.204963	-0.205126	-0.204137	-0.201942	-0.198513	-0.19384	-0.187929	-0.180789	-0.172428	-0.162857	-0.152084
Ta1W3	-12.7732	-0.0898841	-0.194749	-0.193304	-0.196962	-0.202666	-0.208949	-0.215036	-0.220485	-0.225039	-0.228539	-0.230894	-0.232046	-0.231964	-0.230634	-0.228056	-0.224234	-0.219176	-0.212891	-0.205388
Ta2O1	-9.10255	0.306902	0.407497	0.476965	0.540572	0.601538	0.661432	0.721096	0.781016	0.841481	0.902667	0.964686	1.02761	1.09147	1.1563	1.22209	1.28884	1.35655	1.42522	1.49484
Ta2O3	-8.85844	-1.40345	-1.23697	-1.14601	-1.06166	-0.98055	-0.901013	-0.822128	-0.743354	-0.664359	-0.584936	-0.504947	-0.424305	-0.342952	-0.260855	-0.177997	-0.0943681	-0.00996317	0.075222	0.161188
Ta2O5	-9.7476	-3.13023	-2.93937	-2.84048	-2.74852	-2.66006	-2.57339	-2.48754	-2.40197	-2.31632	-2.23036	-2.14395	-2.057	-1.96943	-1.88121	-1.79232	-1.70274	-1.61246	-1.52148	-1.42979
Ta2Ti1	-9.12872	1.33899	1.32582	1.35796	1.38526	1.41078	1.43596	1.46152	1.48789	1.51531	1.54397	1.57439	1.60691	1.64069	1.67575	1.7121	1.74972	1.78863	1.82882	1.87187
Ta2Ti3	-8.94308	0.416762	0.398804	0.429362	0.455146	0.479233	0.503051	0.527334	0.552496	0.578804	0.606454	0.636347	0.669041	0.703029	0.738334	0.774971	0.812951	0.852287	0.892993	0.937907
Ta3Mo1	-11.6696	-0.0681909	-0.114674	-0.0936995	-0.077698	-0.0636119	-0.0499909	-0.036078	-0.0214524	-0.00587208	0.0108064	0.0286661	0.0477571	0.0681064	0.0897229	0.112597	0.136721	0.162089	0.188697	0.216541
Ta3O1	-9.72116	0.29906	0.388297	0.454124	0.514324	0.572072	0.628904	0.685638	0.742742	0.800492	0.859056	0.918535	0.978994	1.04047	1.10297	1.16651	1.23106	1.29663	1.36322	1.43081
Ta3O2	-10.1482	-1.22733	-1.09898	-1.02038	-0.947822	-0.878059	-0.809493	-0.741261	-0.672866	-0.604008	-0.5345	-0.464227	-0.393115	-0.321117	-0.248211	-0.174392	-0.0996591	-0.0240127	0.0525469	0.130017
Ta3Ti1	-10.7834	0.0304673	0.0234584	0.0576493	0.08698	0.114503	0.141652	0.169168	0.197467	0.226798	0.257323	0.289463	0.323477	0.358749	0.395292	0.433099	0.472167	0.512492	0.554076	0.598096
Ta3Ti4	-9.44698	0.0315657	0.0141879	0.0449385	0.0709068	0.0951702	0.119156	0.143597	0.168911	0.195361	0.223142	0.253114	0.285811	0.319799	0.355101	0.391728	0.429692	0.469005	0.509678	0.554414
Ta3W1	-12.1717	-0.0422664	-0.12915	-0.121634	-0.1191	-0.118507	-0.118406	-0.11804	-0.116987	-0.115001	-0.111939	-0.107717	-0.102287	-0.0956224	-0.0877178	-0.0785859	-0.0682392	-0.0566879	-0.043942	-0.0300105
Ta4O1	-11.0502	-0.663524	-0.582591	-0.519446	-0.461786	-0.406465	-0.351967	-0.297488	-0.242569	-0.186944	-0.130451	-0.0729914	-0.0145062	0.0450384	0.105655	0.167337	0.230076	0.293867	0.358703	0.424578
Ta4O5	-9.32499	-1.54425	-1.38263	-1.29321	-1.21027	-1.13048	-1.05217	-0.974445	-0.89677	-0.818821	-0.740394	-0.661358	-0.581626	-0.501146	-0.419884	-0.337828	-0.254969	-0.171303	-0.0868278	-0.00154318
Ti1Mo1	-9.40686	-0.133789	-0.157767	-0.129311	-0.10576	-0.0839922	-0.0625549	-0.0406946	-0.0179842	0.00584869	0.0310018	0.0582473	0.0880682	0.119222	0.151742	0.185655	0.220986	0.257757	0.295989	0.338054
Ti1Mo2	-8.53332	1.26475	1.23556	1.26224	1.28394	1.30378	1.32323	1.34306	1.36369	1.38539	1.40834	1.4331	1.46001	1.48825	1.51785	1.54884	1.58124	1.61508	1.65036	1.68867
Ti1Mo3	-10.2199	-0.159297	-0.184439	-0.156429	-0.133436	-0.112335	-0.0916554	-0.0706281	-0.048821	-0.0259683	-0.0018913	0.0238443	0.0515128	0.0805132	0.110877	0.142628	0.175786	0.21037	0.246396	0.285056
Ti1O1	-8.85344	-2.74276	-2.59814	-2.51426	-2.43659	-2.36178	-2.2882	-2.21497	-2.14159	-2.06769	-1.99305	-1.91684	-1.83857	-1.75944	-1.67942	-1.59847	-1.51656	-1.43366	-1.34976	-1.26248
Ti1O2	-8.82419	-3.24264	-3.06408	-2.96919	-2.88102	-2.79613	-2.71284	-2.63022	-2.5477	-2.46494	-2.38168	-2.29733	-2.2115	-2.12498	-2.03773	-1.94971	-1.86088	-1.77123	-1.68074	-1.58782
Ti1O3	-7.4264	-2.10941	-1.90942	-1.80753	-1.71262	-1.62121	-1.53158	-1.44276	-1.3542	-1.26551	-1.17646	-1.08654	-0.995443	-0.903744	-0.811388	-0.718339	-0.624567	-0.530052	-0.434776	-0.337551
Ti1O4	-6.62111	-1.46286	-1.25319	-1.14817	-1.05027	-0.956007	-0.863627	-0.77216	-0.681023	-0.589845	-0.498372	-0.406176	-0.312982	-0.219233	-0.124876	-0.0298715	0.0658075	0.162181	0.259266	0.358015
Ti1W1	-10.3994	-0.0703075	-0.0980317	-0.0708097	-0.0485095	-0.0280418	-0.0079604	0.0124896	0.0337404	0.0560687	0.0796737	0.105327	0.133512	0.16298	0.193761	0.225874	0.259335	0.294156	0.330349	0.370273
Ti1W3	-11.7301	-0.0853994	-0.111559	-0.0838662	-0.0612169	-0.0405322	-0.0203525	9.29599e-05	0.0212444	0.0433739	0.0666623	0.0915441	0.118292	0.146298	0.175586	0.20617	0.238057	0.271251	0.305751	0.342734
Ti2Mo1	-8.85682	-0.108755	-0.131907	-0.103136	-0.0791956	-0.0569666	-0.0350075	-0.012575	0.0107545	0.0352578	0.0611452	0.089414	0.120687	0.153292	0.187267	0.222639	0.259435	0.297681	0.337401	0.381753
Ti2O1	-8.62618	-1.98637	-1.88445	-1.81451	-1.75027	-1.68845	-1.62751	-1.56661	-1.50527	-1.44317	-1.38007	-1.31494	-1.24714	-1.17833	-1.10846	-1.03751	-0.965437	-0.892217	-0.817827	-0.739108
Ti2O3	-8.91509	-3.12189	-2.95373	-2.86219	-2.77716	-2.69524	-2.61478	-2.53486	-2.45494	-2.37467	-2.29379	-2.21164	-2.12778	-2.04316	-1.95774	-1.87149	-1.78437	-1.69637	-1.60745	-1.51573
Ti2O5	-8.07333	-2.64296	-2.45134	-2.35218	-2.25989	-2.17101	-2.08382	-1.99739	-1.91115	-1.82474	-1.73789	-1.65009	-1.56098	-1.47124	-1.3808	-1.28964	-1.19771	-1.10501	-1.01152	-0.915872
Ti2W1	-9.48366	-0.0315502	-0.0605324	-0.0336961	-0.0117004	0.00855088	0.028495	0.0488763	0.0701216	0.0925107	0.116255	0.142352	0.171423	0.201793	0.233497	0.266558	0.300997	0.336832	0.374081	0.415895
Ti2W3	-10.386	0.469367	0.442713	0.470272	0.49286	0.513563	0.533832	0.554428	0.575788	0.598185	0.621811	0.647304	0.675063	0.704094	0.734426	0.766076	0.799055	0.833374	0.869038	0.907934
Ti3Mo1	-8.57676	-0.0912	-0.113807	-0.0848356	-0.060656	-0.0381523	-0.0158883	0.00687428	0.0305572	0.0554397	0.0817382	0.110563	0.142605	0.175981	0.210726	0.246872	0.284445	0.323472	0.363979	0.409519
Ti3Mo2	-8.78473	0.173339	0.150261	0.17904	0.202959	0.225138	0.247023	0.269362	0.292578	0.316948	0.342676	0.37067	0.401497	0.433656	0.467183	0.502107	0.538452	0.576242	0.615501	0.659073
Ti3O1	-8.45426	-1.54989	-1.472	-1.40992	-1.35328	-1.29885	-1.24512	-1.19128	-1.13686	-1.08154	-1.0251	-0.966398	-0.904728	-0.841968	-0.778074	-0.713011	-0.646748	-0.579259	-0.510517	-0.436971
Ti3O2	-8.70497	-2.27682	-2.15644	-2.08046	-2.01039	-1.94292	-1.87646	-1.81017	-1.74356	-1.67628	-1.6081	-1.53808	-1.46563	-1.39224	-1.31785	-1.24244	-1.16597	-1.08842	-1.00977	-0.927166
Ti3O5	-8.88739	-3.17356	-3.0016	-2.90884	-2.82266	-2.73967	-2.65818	-2.57728	-2.49642	-2.41524	-2.33351	-2.25057	-2.166	-2.0807	-1.99463	-1.90775	-1.82002	-1.73144	-1.64196	-1.54983
Ti3W1	-9.02446	-0.0108694	-0.0403073	-0.013606	0.0082952	0.0284961	0.0484294	0.0688341	0.0901345	0.112612	0.136484	0.162859	0.192431	0.223311	0.255534	0.289127	0.324112	0.360512	0.398347	0.441163
Ti4Mo3	-8.96764	0.0804278	0.0562118	0.0846052	0.108126	0.129894	0.151358	0.173266	0.196044	0.219967	0.245238	0.272725	0.30297	0.334549	0.367495	0.401836	0.437598	0.474804	0.513476	0.556324
Ti4O11	-7.81103	-2.44113	-2.24752	-2.14773	-2.05486	-1.96545	-1.87778	-1.7909	-1.70424	-1.61744	-1.53024	-1.44213	-1.35279	-1.26282	-1.17218	-1.08084	-0.988751	-0.895906	-0.802283	-0.706617
Ti4O5	-8.8772	-2.9429	-2.78321	-2.69441	-2.61199	-2.53257	-2.45451	-2.3769	-2.29922	-2.22112	-2.14236	-2.06218	-1.98014	-1.8973	-1.81362	-1.72907	-1.6436	-1.5572	-1.46985	-1.37944
Ti4O7	-8.86679	-3.18903	-3.01347	-2.91952	-2.83219	-2.74808	-2.6655	-2.58352	-2.50161	-2.4194	-2.33665	-2.25272	-2.1672	-2.08097	-1.99397	-1.90618	-1.81755	-1.72807	-1.63771	-1.54476
Ti4W3	-9.82135	0.131915	0.103181	0.130081	0.152093	0.172312	0.192177	0.212441	0.233533	0.25573	0.279238	0.304925	0.333332	0.36303	0.39405	0.426412	0.460135	0.495235	0.531723	0.5723
Ti5Mo1	-8.20317	0.0198941	-0.00272027	0.0262676	0.0505017	0.0730957	0.0954803	0.118389	0.142241	0.167318	0.193844	0.22304	0.255668	0.289629	0.324962	0.361696	0.399862	0.439486	0.480597	0.52714
Ti5O12	-7.92993	-2.47288	-2.28814	-2.19125	-2.10121	-2.01455	-1.92957	-1.84533	-1.76127	-1.67702	-1.59233	-1.50666	-1.41965	-1.33199	-1.24364	-1.15455	-1.0647	-0.974056	-0.882611	-0.788966
Ti5O9	-8.85639	-3.19925	-3.02224	-2.92782	-2.84005	-2.7555	-2.6725	-2.59012	-2.50781	-2.42522	-2.34209	-2.2578	-2.17195	-2.08539	-1.99807	-1.90996	-1.82102	-1.73123	-1.64058	-1.54737
Ti5W1	-8.52912	0.0459634	0.0157129	0.0421602	0.063848	0.0838795	0.103683	0.123992	0.145229	0.167675	0.191555	0.218092	0.248045	0.279316	0.311939	0.345944	0.381357	0.418203	0.456504	0.500205
Ti6O1	-8.17752	-0.932997	-0.885061	-0.832773	-0.785601	-0.740365	-0.695588	-0.650503	-0.604663	-0.557767	-0.509576	-0.458825	-0.404725	-0.34943	-0.292899	-0.235096	-0.175992	-0.115558	-0.053766	0.0134421
Ti6O11	-8.85286	-3.20906	-3.0345	-2.94091	-2.85397	-2.77028	-2.68813	-2.60662	-2.52518	-2.44346	-2.36122	-2.27783	-2.19289	-2.10724	-2.02085	-1.93366	-1.84565	-1.7568	-1.66708	-1.57483
Ti7O13	-8.84126	-3.2068	-3.02812	-2.93315	-2.84485	-2.7598	-2.67631	-2.59345	-2.51068	-2.42763	-2.34406	-2.25934	-2.1731	-2.08615	-1.99845	-1.90996	-1.82065	-1.7305	-1.63949	-1.54597
W11O12	-9.68283	-1.12449	-0.987482	-0.906276	-0.83158	-0.76005	-0.690028	-0.620599	-0.551222	-0.481564	-0.411414	-0.340633	-0.269132	-0.196852	-0.123755	-0.0498185	0.0249722	0.100624	0.177138	0.254514
W1O1	-9.30424	-0.562491	-0.422613	-0.340416	-0.264673	-0.192051	-0.120901	-0.050312	0.020252	0.0911221	0.162508	0.234545	0.307323	0.380898	0.455308	0.530575	0.606714	0.683729	0.761624	0.840395
W1O2	-9.51237	-2.17678	-2.00162	-1.90793	-1.82113	-1.73778	-1.65619	-1.5754	-1.49485	-1.41419	-1.33318	-1.25168	-1.1696	-1.08686	-1.00343	-0.919279	-0.834382	-0.748734	-0.662328	-0.575163
W1O3	-9.07829	-2.44577	-2.26194	-2.16549	-2.07614	-1.99042	-1.9066	-1.8237	-1.74114	-1.65856	-1.57573	-1.49249	-1.40874	-1.32441	-1.23946	-1.15385	-1.06756	-0.980581	-0.892906	-0.804532
W2O3	-9.6402	-1.74214	-1.57982	-1.4903	-1.40749	-1.32801	-1.25017	-1.17303	-1.09605	-1.01888	-0.941294	-0.863156	-0.784369	-0.704872	-0.624623	-0.543597	-0.461778	-0.379157	-0.29573	-0.211497
W3O1	-10.2325	0.618476	0.691276	0.751509	0.805932	0.857746	0.908513	0.959081	1.00994	1.06139	1.11363	1.16675	1.22085	1.27596	1.33212	1.38933	1.44761	1.50695	1.56736	1.62882
W3O2	-9.88461	-0.299163	-0.188756	-0.116225	-0.0498897	0.0135288	0.0756458	0.137346	0.199149	0.261372	0.324217	0.387809	0.452235	0.517545	0.583773	0.650939	0.719054	0.78812	0.858139	0.929105
W3O8	-9.16572	-2.34145	-2.15438	-2.05681	-1.96628	-1.87934	-1.79425	-1.71006	-1.62618	-1.54225	-1.45805	-1.37341	-1.28825	-1.20248	-1.11607	-1.02899	-0.941211	-0.852725	-0.763526	-0.673612
W4O5	-9.12701	-0.853973	-0.700543	-0.613917	-0.533887	-0.457094	-0.381865	-0.307278	-0.232787	-0.158054	-0.0828629	-0.00707521	0.0694027	0.146629	0.224644	0.303472	0.383128	0.46362	0.544949	0.627116
Zr1Mo1	-9.68909	0.00853464	-0.0279568	-0.00369714	0.0155459	0.0328662	0.0497469	0.0669832	0.0850307	0.104167	0.124571	0.147509	0.172347	0.198467	0.22589	0.254635	0.284716	0.316147	0.348942	0.383112
Zr1Mo2	-10.2188	-0.137657	-0.179229	-0.156694	-0.139213	-0.12368	-0.108611	-0.093214	-0.0770399	-0.0598171	-0.0413728	-0.0208314	0.00140733	0.0249439	0.049803	0.0760037	0.103561	0.132488	0.162799	0.194505
Zr1Mo3	-10.272	0.000812008	-0.0431446	-0.0214183	-0.00476606	0.00992522	0.0241408	0.0386701	0.0539598	0.0702782	0.0877948	0.10719	0.128182	0.150479	0.174109	0.199089	0.225437	0.253164	0.282285	0.312812
Zr1O1	-9.05833	-2.52309	-2.37645	-2.29192	-2.21371	-2.13851	-2.06464	-1.9912	-1.91763	-1.84359	-1.76885	-1.69211	-1.61397	-1.53503	-1.45527	-1.37464	-1.29313	-1.21073	-1.12742	-1.04319
Zr1O2	-9.49757	-3.63298	-3.45168	-3.35589	-3.26689	-3.18127	-3.09733	-3.01409	-2.93099	-2.84766	-2.76387	-2.67869	-2.59249	-2.50563	-2.41808	-2.32981	-2.24079	-2.151	-2.06044	-1.96909
Zr1O3	-8.01639	-2.48713	-2.28864	-2.18727	-2.09292	-2.00215	-1.91321	-1.82513	-1.73731	-1.64938	-1.56112	-1.47177	-1.38158	-1.29081	-1.19942	-1.10737	-1.01464	-0.921212	-0.82707	-0.732208
Zr1Ta1	-10.1049	0.0949582	0.0595088	0.0842066	0.103993	0.121912	0.139423	0.157304	0.175997	0.19577	0.21679	0.240315	0.265702	0.29232	0.32018	0.34928	0.379619	0.411196	0.444014	0.478075
Zr1Ta3	-10.9134	0.112742	0.0787603	0.103947	0.124218	0.142612	0.160577	0.178876	0.197938	0.218015	0.23926	0.262341	0.286958	0.312808	0.339897	0.368214	0.397751	0.428501	0.460461	0.493628
Zr1Ti1	-8.12445	-0.00183944	-0.0153094	0.0167397	0.0439986	0.0695504	0.0948439	0.120644	0.147396	0.175391	0.204846	0.237701	0.273742	0.311066	0.349699	0.389667	0.430992	0.473695	0.5178	0.565679
Zr1Ti2	-7.9918	-0.0107006	-0.0266548	0.00457465	0.0310512	0.055867	0.0804609	0.105584	0.131672	0.159014	0.187833	0.219906	0.255389	0.292172	0.330286	0.369759	0.410615	0.45288	0.496579	0.54487
Zr1Ti3	-7.92927	-0.0189314	-0.0362146	-0.00542386	0.0206326	0.0450514	0.0692666	0.0940224	0.119749	0.146736	0.175208	0.206861	0.242037	0.27852	0.316345	0.355541	0.396135	0.438151	0.481618	0.530087
Zr1Ti5	-7.86556	-0.025982	-0.0445071	-0.0141261	0.0115392	0.0355901	0.0594556	0.083873	0.109268	0.135928	0.164083	0.195344	0.230241	0.266455	0.30402	0.342968	0.383328	0.425125	0.468389	0.517065
Zr1W1	-10.6599	0.0938115	0.0436747	0.0634005	0.0780925	0.0908131	0.103038	0.115564	0.128852	0.143184	0.158741	0.176787	0.196689	0.217823	0.240207	0.263852	0.288763	0.314945	0.342401	0.37113
Zr1W2	-11.6336	-0.144438	-0.19809	-0.179561	-0.16611	-0.154672	-0.143773	-0.132618	-0.120751	-0.107896	-0.0938775	-0.0778199	-0.0601243	-0.0411966	-0.0210181	0.000420348	0.0231224	0.0470892	0.0723193	0.0988099
Zr1W3	-11.7739	0.0830291	0.0263203	0.0438176	0.0562153	0.0665789	0.0763829	0.0864189	0.0971416	0.108825	0.121642	0.136272	0.152431	0.169823	0.188465	0.208368	0.229532	0.251958	0.275642	0.30058
Zr2Mo1	-9.29551	0.0186348	-0.0132574	0.0125655	0.0334098	0.0523571	0.0708887	0.0898039	0.109564	0.130453	0.152657	0.17783	0.205107	0.233649	0.263475	0.294604	0.327048	0.360822	0.39594	0.432414
Zr2O1	-8.88695	-1.68107	-1.5891	-1.5225	-1.46176	-1.40363	-1.34652	-1.28954	-1.23218	-1.17409	-1.11508	-1.05344	-0.990041	-0.925699	-0.860386	-0.794079	-0.726761	-0.658416	-0.58903	-0.518593
Zr2O3	-9.2381	-3.10525	-2.94098	-2.85076	-2.76713	-2.68674	-2.60788	-2.52962	-2.45139	-2.37284	-2.29372	-2.21298	-2.13106	-2.04843	-1.96505	-1.88089	-1.79594	-1.71016	-1.62356	-1.53612
Zr2O5	-8.40959	-2.73661	-2.55425	-2.45819	-2.36905	-2.28341	-2.19953	-2.11644	-2.03356	-1.95053	-1.8671	-1.78246	-1.6969	-1.61073	-1.5239	-1.43639	-1.34817	-1.25922	-1.16953	-1.07909
Zr2O7	-7.36571	-1.94822	-1.75192	-1.65133	-1.55784	-1.46799	-1.38003	-1.29297	-1.20622	-1.1194	-1.03229	-0.944188	-0.855313	-0.765883	-0.675851	-0.585184	-0.493856	-0.401853	-0.309159	-0.215767
Zr2Ta1	-9.53439	0.114571	0.07788	0.102164	0.121539	0.139054	0.156175	0.173688	0.192048	0.21153	0.232313	0.256047	0.281858	0.308901	0.337188	0.366722	0.397506	0.429547	0.462849	0.497418
Zr2Ti1	-8.25475	0.00938337	-0.00145357	0.0314647	0.0595555	0.0858929	0.111936	0.138463	0.165929	0.194626	0.224765	0.258453	0.295101	0.333015	0.372217	0.41273	0.454573	0.497765	0.542325	0.58984
Zr2W1	-9.87176	0.146424	0.0999829	0.120966	0.136959	0.151023	0.164633	0.178591	0.193361	0.20923	0.226385	0.24648	0.268649	0.29205	0.3167	0.342611	0.369792	0.398249	0.42799	0.45902
Zr3Mo1	-9.06993	0.0524733	0.0229821	0.0496202	0.071299	0.0910935	0.110484	0.130273	0.150923	0.172722	0.195859	0.222184	0.250714	0.280501	0.311562	0.343917	0.377577	0.412556	0.448869	0.486528
Zr3O1	-9.01997	-1.47876	-1.40014	-1.33785	-1.28117	-1.22692	-1.17352	-1.12011	-1.06618	-1.01141	-0.955594	-0.89685	-0.836153	-0.774443	-0.711693	-0.647882	-0.582993	-0.517012	-0.449924	-0.38172
Zr3O2	-9.16526	-2.22764	-2.10804	-2.03236	-1.96271	-1.89583	-1.83009	-1.76461	-1.69884	-1.63246	-1.56523	-1.49563	-1.42442	-1.35232	-1.27931	-1.20535	-1.13044	-1.05455	-0.977675	-0.899802
Zr3Ta1	-9.27142	0.102093	0.0647467	0.0888119	0.10797	0.125272	0.142186	0.159505	0.177686	0.197012	0.217665	0.241491	0.267503	0.294747	0.323235	0.352975	0.383972	0.416232	0.449765	0.484577
Zr3Ti1	-8.31968	0.015218	0.00556582	0.0388748	0.0673376	0.0940239	0.120397	0.147244	0.175023	0.204027	0.234465	0.268525	0.305433	0.343597	0.38304	0.423782	0.46584	0.509232	0.553976	0.601265
Zr3Ti2	-7.99884	0.208687	0.19647	0.228932	0.256582	0.282496	0.30813	0.334258	0.36133	0.389637	0.419394	0.45264	0.488937	0.526506	0.565371	0.605558	0.647085	0.689972	0.734242	0.781794
Zr3Ti4	-8.0637	-0.00173555	-0.0162773	0.0154182	0.0423395	0.0675735	0.0925648	0.118073	0.144538	0.17225	0.20143	0.233948	0.269748	0.306837	0.345245	0.384999	0.42612	0.468634	0.512562	0.560615
Zr3W1	-9.51267	0.137758	0.093058	0.114634	0.131242	0.145941	0.160208	0.174846	0.190322	0.206923	0.224841	0.245924	0.269191	0.29369	0.319436	0.346445	0.374725	0.404284	0.435132	0.467276
Zr4Mo3	-9.46337	0.069903	0.035498	0.060466	0.0804337	0.0984897	0.116116	0.134111	0.152931	0.172857	0.19407	0.218005	0.243927	0.271123	0.299614	0.329419	0.360551	0.393025	0.426854	0.462049
Zr4O11	-8.28129	-2.68496	-2.49366	-2.39465	-2.30263	-2.21414	-2.12745	-2.04158	-1.95596	-1.8702	-1.78408	-1.69682	-1.60868	-1.51994	-1.43057	-1.34053	-1.24979	-1.15834	-1.06616	-0.973253
Zr4O5	-8.60094	-2.28925	-2.13427	-2.04706	-1.96633	-1.88872	-1.81257	-1.73693	-1.66126	-1.58519	-1.50851	-1.43003	-1.35027	-1.26977	-1.18848	-1.10638	-1.02344	-0.939647	-0.854991	-0.76946
Zr4Ta3	-9.85632	0.107429	0.0714371	0.095954	0.115561	0.133304	0.150644	0.168363	0.18691	0.206555	0.22747	0.251081	0.276646	0.303443	0.331483	0.360765	0.391291	0.423063	0.456086	0.490361
Zr4Ti3	-8.17563	0.00763767	-0.00477932	0.0276171	0.0552074	0.0810707	0.10666	0.132747	0.15978	0.18805	0.217773	0.25096	0.287236	0.324787	0.363639	0.403816	0.445338	0.488225	0.5325	0.580198
Zr4W3	-10.2851	0.153353	0.104749	0.124996	0.140228	0.153507	0.166308	0.179431	0.193337	0.20831	0.224534	0.24344	0.264297	0.286385	0.309723	0.334321	0.360188	0.387328	0.415745	0.445443
Zr5Mo1	-8.77061	0.160047	0.132533	0.159845	0.182217	0.202718	0.222827	0.243347	0.264747	0.287315	0.311244	0.338579	0.368222	0.399112	0.431268	0.464706	0.499441	0.535484	0.572852	0.611555
Zr5Ta1	-9.00207	0.0959937	0.0579553	0.0817898	0.100719	0.117795	0.13449	0.151601	0.169592	0.188749	0.209259	0.233166	0.259367	0.2868	0.315477	0.34541	0.376606	0.409075	0.442826	0.477869
Zr5W1	-9.08512	0.197558	0.154574	0.176734	0.193948	0.209275	0.224191	0.2395	0.255673	0.272999	0.291671	0.313735	0.338091	0.363679	0.390514	0.418612	0.447982	0.478635	0.510582	0.543831
Mo1W1O3	-8.49446	-1.01883	-0.88472	-0.804611	-0.731207	-0.66111	-0.592631	-0.524837	-0.457175	-0.389304	-0.321004	-0.252134	-0.182597	-0.11233	-0.0412893	0.0305526	0.103216	0.176713	0.251051	0.326236
Mo1W2O4	-8.78697	-0.949587	-0.822221	-0.744312	-0.673036	-0.605014	-0.538568	-0.472772	-0.407077	-0.341145	-0.27476	-0.207782	-0.140115	-0.0716986	-0.00249192	0.0675325	0.138392	0.210098	0.282657	0.35607
Mo2W2O5	-8.64734	-0.843664	-0.719661	-0.64285	-0.572629	-0.505621	-0.440154	-0.375304	-0.310529	-0.24549	-0.179975	-0.113844	-0.047003	0.0206087	0.089033	0.158297	0.22842	0.299414	0.371286	0.44404
Ta1Mo1O3	-8.83638	-1.58228	-1.44346	-1.36175	-1.28669	-1.2149	-1.1447	-1.07515	-1.00571	-0.93605	-0.865952	-0.795277	-0.723933	-0.651859	-0.579016	-0.505379	-0.430932	-0.355664	-0.279567	-0.202637
Ta1Mo1W1	-11.0791	0.807806	0.737831	0.750909	0.758915	0.764927	0.77041	0.776137	0.782543	0.789881	0.798305	0.807906	0.81874	0.830841	0.844225	0.858895	0.874849	0.892087	0.910607	0.930407
Ta1Mo1W2	-12.2288	-0.07357	-0.153002	-0.143086	-0.138265	-0.135465	-0.133217	-0.130745	-0.127611	-0.123559	-0.118431	-0.112137	-0.104617	-0.0958393	-0.0857858	-0.0744538	-0.0618437	-0.0479572	-0.0327989	-0.016373
Ta1Mo2W1	-11.7662	-0.138964	-0.215821	-0.205054	-0.199374	-0.19569	-0.192529	-0.189118	-0.185021	-0.179982	-0.173847	-0.166523	-0.157951	-0.148096	-0.136939	-0.124472	-0.110693	-0.0955982	-0.0791862	-0.061456
Ta1Mo2W2	-10.9686	0.925207	0.850693	0.862236	0.868676	0.873101	0.876981	0.881095	0.88588	0.891594	0.898393	0.906371	0.915587	0.926076	0.937858	0.950939	0.965321	0.981007	0.997995	1.01628
Ta1Ti1Mo1	-9.60846	0.524426	0.490847	0.516124	0.536492	0.555041	0.57322	0.591781	0.611146	0.631576	0.65325	0.676707	0.702284	0.729162	0.757362	0.786898	0.817778	0.850014	0.883618	0.920166
Ta1Ti1Mo2	-10.4502	-0.138519	-0.17584	-0.151843	-0.132812	-0.115645	-0.098883	-0.081767	-0.0638702	-0.0449324	-0.0247803	-0.00298427	0.020725	0.0457419	0.0720913	0.0997868	0.12884	0.159264	0.191068	0.22544
Ta1Ti1O3	-8.80937	-2.18528	-2.03232	-1.94585	-1.86594	-1.78921	-1.714	-1.63938	-1.56481	-1.48996	-1.4146	-1.33831	-1.26084	-1.18264	-1.10367	-1.0239	-0.94331	-0.861888	-0.779622	-0.695563
Ta1Ti1O4	-9.14811	-2.87415	-2.70946	-2.6192	-2.53571	-2.45555	-2.37703	-2.29923	-2.22159	-2.14375	-2.06548	-1.98642	-1.90633	-1.82556	-1.74408	-1.66187	-1.57888	-1.49513	-1.41058	-1.32445
Ta1Ti1W1	-10.2184	0.6185	0.57335	0.59478	0.611289	0.625947	0.640198	0.654794	0.670162	0.686565	0.704181	0.723553	0.745015	0.767744	0.791761	0.817072	0.843681	0.871593	0.900812	0.93291
Ta1Ti1W2	-11.3993	-0.031569	-0.0836772	-0.0645957	-0.0504966	-0.0383098	-0.0265845	-0.0145595	-0.0018028	0.0119497	0.0268729	0.0433967	0.0617891	0.0814398	0.102369	0.124583	0.148086	0.17288	0.198964	0.227515
Ta1Ti2Mo1	-9.50602	0.0181604	-0.012456	0.0138328	0.0352694	0.0549502	0.0743163	0.0941121	0.114759	0.136524	0.159599	0.184751	0.21246	0.241476	0.271829	0.303533	0.336607	0.371064	0.406921	0.446545
Ta1Ti2O4	-8.94437	-2.46697	-2.32032	-2.23589	-2.15794	-2.08307	-2.00963	-1.93672	-1.8638	-1.79054	-1.71669	-1.64173	-1.56534	-1.48819	-1.41023	-1.33143	-1.25177	-1.17124	-1.08982	-1.00615
Ta1Ti2W1	-9.98712	0.0650912	0.0224261	0.0447059	0.062125	0.0777639	0.0930601	0.108759	0.125284	0.142905	0.161814	0.182778	0.206277	0.231059	0.257149	0.284562	0.313308	0.343399	0.374845	0.410007
Ta1Ti2W2	-10.0144	0.619433	0.572338	0.593114	0.608968	0.622978	0.63659	0.650556	0.665305	0.681107	0.698147	0.71706	0.73824	0.760693	0.784444	0.809504	0.835882	0.863587	0.892624	0.92488
Ta1W1O3	-8.76879	-1.09227	-0.963754	-0.885473	-0.813854	-0.74552	-0.678792	-0.612743	-0.546825	-0.480701	-0.414158	-0.347055	-0.279301	-0.210837	-0.141624	-0.071643	-0.000879403	0.0706732	0.143019	0.216158
Ta1W2O4	-9.10999	-1.12911	-1.01029	-0.935202	-0.866717	-0.801471	-0.737791	-0.674758	-0.611825	-0.548658	-0.485043	-0.420843	-0.355966	-0.290354	-0.223969	-0.15679	-0.0888033	-0.0200024	0.0496161	0.120052
Ta2Mo1O4	-9.11821	-1.59731	-1.46272	-1.38236	-1.30856	-1.23796	-1.16888	-1.10042	-1.03202	-0.963371	-0.894254	-0.824535	-0.754124	-0.682965	-0.611019	-0.538267	-0.464696	-0.390298	-0.315065	-0.238996
Ta2Mo1W1	-12.0232	-0.144834	-0.216112	-0.20344	-0.195802	-0.190133	-0.184972	-0.179552	-0.173446	-0.166403	-0.158274	-0.14897	-0.138438	-0.126648	-0.113586	-0.0992567	-0.083663	-0.0668091	-0.0486994	-0.0293379
Ta2Mo1W2	-10.9523	1.14243	1.07159	1.08439	1.09213	1.09788	1.1031	1.10855	1.11468	1.12173	1.12986	1.13916	1.14968	1.16145	1.1745	1.1888	1.20437	1.2212	1.23928	1.25861
Ta2Mo2O11	-9.00916	-2.66533	-2.49788	-2.40684	-2.32282	-2.24237	-2.16374	-2.08597	-2.00851	-1.93098	-1.85316	-1.7749	-1.69611	-1.6167	-1.53665	-1.45591	-1.37448	-1.29232	-1.20945	-1.12584
Ta2Mo2O5	-8.7865	-1.22898	-1.0996	-1.02097	-0.948864	-0.87993	-0.812498	-0.745653	-0.678859	-0.611786	-0.544227	-0.476044	-0.40715	-0.337485	-0.267011	-0.195706	-0.123555	-0.0505476	0.0233238	0.0980634
Ta2Ti1Mo1	-10.6302	-0.0673809	-0.0959553	-0.0689982	-0.046954	-0.0267454	-0.00692666	0.0132528	0.0342143	0.056212	0.0794139	0.104245	0.13097	0.158978	0.188288	0.218903	0.250826	0.284064	0.318622	0.355681
Ta2Ti1W1	-11.1334	-0.0425658	-0.0870897	-0.0654419	-0.0487154	-0.0338489	-0.0194003	-0.00461816	0.0109214	0.0274746	0.0452102	0.0645536	0.0857682	0.108241	0.131989	0.157011	0.183308	0.210879	0.239725	0.271022
Ta2Ti2O5	-9.11175	-2.25423	-2.10823	-2.024	-1.9462	-1.87148	-1.79818	-1.72539	-1.6526	-1.57946	-1.50575	-1.43103	-1.35502	-1.27825	-1.20066	-1.12223	-1.04296	-0.962807	-0.881778	-0.798815
Ta2W2O5	-9.1589	-1.13202	-1.01573	-0.941456	-0.87372	-0.809174	-0.746153	-0.683745	-0.621409	-0.558815	-0.495753	-0.432088	-0.367731	-0.302625	-0.236733	-0.170038	-0.102528	-0.0341967	0.0349586	0.104937
Ti1Mo1O3	-8.10133	-1.67812	-1.52685	-1.44098	-1.36171	-1.28565	-1.21111	-1.13718	-1.06329	-0.989124	-0.914433	-0.838805	-0.761979	-0.684403	-0.60603	-0.526825	-0.446763	-0.365825	-0.283993	-0.200315
Ti1Mo1W1	-9.84552	0.656595	0.614167	0.636445	0.653731	0.669128	0.684098	0.699404	0.71548	0.732597	0.750942	0.771061	0.793297	0.816833	0.841697	0.86791	0.895486	0.924441	0.954783	0.988092
Ti1Mo1W2	-11.1872	-0.0705608	-0.113155	-0.0909468	-0.0737742	-0.0585418	-0.0437864	-0.0287381	-0.0129592	0.00382025	0.0217805	0.0413558	0.0628194	0.0855657	0.109622	0.135004	0.161723	0.189789	0.219207	0.251157
Ti1Mo2W1	-10.7422	-0.15359	-0.198059	-0.176484	-0.159935	-0.145302	-0.131118	-0.116614	-0.101355	-0.0850724	-0.0675875	-0.0484658	-0.0274335	-0.00509388	0.0185824	0.0436152	0.0700203	0.0978112	0.126999	0.158771
Ti1W1O3	-8.5053	-1.65967	-1.5109	-1.42585	-1.34742	-1.27221	-1.19854	-1.1255	-1.05254	-0.979302	-0.905561	-0.830903	-0.755063	-0.678493	-0.601148	-0.522996	-0.444014	-0.364187	-0.283503	-0.201014
Ti1W2O4	-8.98594	-1.59856	-1.45552	-1.37236	-1.29576	-1.22236	-1.15048	-1.0792	-1.00799	-0.936498	-0.864497	-0.791654	-0.717756	-0.643109	-0.567669	-0.491407	-0.414304	-0.336348	-0.257527	-0.177167
Ti2Mo1O4	-8.60099	-2.26708	-2.12211	-2.03828	-1.96094	-1.8867	-1.81391	-1.74164	-1.66937	-1.59675	-1.52354	-1.44921	-1.37344	-1.29689	-1.21952	-1.14128	-1.06216	-0.98213	-0.901175	-0.817937
Ti2Mo1W1	-9.81095	-0.00985299	-0.0473309	-0.0233673	-0.0043171	0.012925	0.0298088	0.0470884	0.0651934	0.0843985	0.104902	0.127476	0.152603	0.179038	0.206813	0.235951	0.266471	0.298392	0.331729	0.368848
Ti2Mo2O5	-8.28604	-1.65173	-1.51077	-1.42826	-1.35223	-1.2793	-1.2078	-1.13683	-1.06585	-0.994513	-0.9226	-0.849665	-0.775429	-0.700401	-0.624533	-0.547792	-0.470152	-0.391594	-0.3121	-0.230614
Ti2W2O5	-8.85051	-1.74684	-1.60633	-1.52397	-1.44809	-1.37534	-1.30404	-1.23329	-1.16255	-1.09149	-1.01986	-0.947228	-0.873316	-0.798633	-0.723135	-0.646791	-0.569579	-0.491484	-0.412493	-0.331555
Zr1Mo1O3	-8.2948	-1.70177	-1.56001	-1.47732	-1.40128	-1.3285	-1.25729	-1.1867	-1.11619	-1.0454	-0.974114	-0.901713	-0.828382	-0.754323	-0.679491	-0.603857	-0.527398	-0.450098	-0.371944	-0.292927
Zr1Mo1W1	-10.1039	0.681219	0.629492	0.648653	0.662748	0.674862	0.686475	0.698379	0.711028	0.724695	0.739555	0.756483	0.775079	0.79494	0.816087	0.838535	0.862293	0.887369	0.913768	0.941495
Zr1Mo1W2	-11.2275	0.10139	0.0457946	0.0636558	0.0764259	0.0871863	0.0974151	0.107903	0.119102	0.131285	0.144623	0.159796	0.17652	0.194501	0.21376	0.234309	0.256156	0.279303	0.303754	0.329509
Zr1Mo2O8	-8.65567	-2.61661	-2.45571	-2.36685	-2.28501	-2.20671	-2.13023	-2.05459	-1.97922	-1.90375	-1.82797	-1.75149	-1.67434	-1.59657	-1.51815	-1.43902	-1.35917	-1.27859	-1.19725	-1.11515
Zr1Mo2W1	-10.819	-0.0181371	-0.0741948	-0.0564951	-0.0438778	-0.0332458	-0.0231176	-0.0127029	-0.00155235	0.0106044	0.0239375	0.0391279	0.0558916	0.0739369	0.0932873	0.113959	0.135961	0.159305	0.183997	0.210044
Zr1Ta1Mo1	-9.89838	0.517553	0.475153	0.497474	0.51481	0.530235	0.545217	0.560536	0.576633	0.593773	0.612121	0.632547	0.654644	0.678006	0.702649	0.72858	0.755801	0.784318	0.814138	0.845264
Zr1Ta1Mo2	-10.5695	-0.0455475	-0.0939595	-0.0736731	-0.058408	-0.0450759	-0.0322039	-0.0190116	-0.00505781	0.00992006	0.026086	0.0441165	0.0637229	0.0846111	0.1068	0.1303	0.155117	0.181259	0.208733	0.237546
Zr1Ta1O3	-8.93398	-2.14007	-1.99376	-1.90951	-1.83188	-1.75748	-1.68464	-1.61242	-1.54027	-1.46785	-1.39494	-1.32092	-1.246	-1.17036	-1.09397	-1.01682	-0.93888	-0.860145	-0.780603	-0.700252
Zr1Ta1Ti1	-8.57295	0.792972	0.769003	0.797544	0.821252	0.843192	0.864811	0.886866	0.909795	0.933868	0.959277	0.987342	1.01794	1.04979	1.08294	1.11738	1.15312	1.19018	1.22857	1.26986
Zr1Ta1Ti2	-8.86318	0.0857727	0.0630218	0.0919775	0.116138	0.138582	0.160746	0.183383	0.206921	0.231637	0.257733	0.286561	0.31825	0.351222	0.385501	0.421104	0.458045	0.496339	0.536003	0.579404
Zr1Ta1W1	-10.5091	0.61086	0.555075	0.572943	0.585815	0.596744	0.607192	0.617941	0.629436	0.641943	0.65563	0.671365	0.688741	0.70735	0.727204	0.748304	0.770649	0.794237	0.819067	0.845137
Zr1Ta1W2	-11.4914	0.088623	0.0225417	0.0369529	0.0463256	0.0537166	0.0605915	0.0677323	0.0755855	0.0844176	0.0943942	0.106192	0.119521	0.134082	0.149891	0.166949	0.185255	0.204806	0.2256	0.247631
Zr1Ta2Mo1	-10.7132	0.0618922	0.0213383	0.0442894	0.0622718	0.0783492	0.0939819	0.109942	0.126664	0.144406	0.163326	0.184096	0.206422	0.230005	0.254858	0.280981	0.308372	0.337033	0.366964	0.398168
Zr1Ta2Ti1	-9.82256	0.165014	0.145114	0.175007	0.200045	0.223286	0.246173	0.269462	0.293585	0.318803	0.345296	0.374072	0.405047	0.437281	0.470787	0.505569	0.541629	0.578974	0.617608	0.658714
Zr1Ta2W1	-11.222	0.08107	0.0229348	0.0400328	0.0521535	0.0623448	0.0720635	0.0820821	0.0928387	0.104592	0.117502	0.13224	0.148511	0.166016	0.184764	0.20475	0.22597	0.24842	0.272095	0.296993
Zr1Ti1Mo1	-8.58898	0.442125	0.414498	0.441759	0.464117	0.48467	0.50488	0.525519	0.547028	0.56969	0.5937	0.620386	0.649626	0.680164	0.712029	0.745245	0.77983	0.815805	0.853189	0.893566
Zr1Ti1Mo2	-9.46049	0.0248621	-0.00272096	0.0245209	0.0468021	0.06723	0.087273	0.107705	0.128968	0.151337	0.174999	0.200975	0.229188	0.258709	0.289564	0.321778	0.355368	0.390352	0.42675	0.465751
Zr1Ti1O3	-8.49775	-2.53473	-2.37618	-2.28785	-2.20608	-2.12748	-2.05037	-1.97383	-1.89731	-1.82046	-1.74302	-1.66412	-1.58379	-1.50272	-1.42088	-1.33823	-1.25474	-1.17041	-1.0852	-0.998178
Zr1Ti1W1	-9.15255	0.582594	0.550263	0.575967	0.596755	0.615706	0.634277	0.65324	0.673042	0.693964	0.716207	0.741097	0.768511	0.79719	0.82716	0.85844	0.891043	0.924983	0.960272	0.998488
Zr1Ti1W2	-10.3601	0.18134	0.148127	0.173507	0.193908	0.212408	0.230467	0.248861	0.268036	0.288272	0.309759	0.333514	0.359464	0.38667	0.415158	0.444943	0.476035	0.508442	0.542172	0.578405
Zr1Ti2Mo1	-8.66353	0.0343142	0.0110113	0.0397376	0.0636164	0.0857499	0.107589	0.129893	0.153098	0.177486	0.203263	0.231787	0.263192	0.295904	0.329954	0.365369	0.402171	0.440382	0.480024	0.523469
Zr1Ti2O1	-8.3138	-1.19715	-1.13334	-1.07596	-1.02408	-0.97449	-0.925642	-0.876718	-0.827236	-0.77688	-0.725419	-0.671476	-0.614905	-0.557269	-0.498531	-0.438659	-0.377628	-0.315416	-0.252	-0.185009
Zr1Ti2W1	-9.14253	0.0833444	0.054222	0.0810158	0.102954	0.123122	0.142967	0.163251	0.18441	0.20673	0.230418	0.256831	0.286102	0.316656	0.348521	0.38172	0.416271	0.452192	0.489499	0.530558
Zr1W1O3	-8.65256	-1.63711	-1.49551	-1.41287	-1.33689	-1.26418	-1.19307	-1.1226	-1.05223	-0.981593	-0.910477	-0.838267	-0.765146	-0.691315	-0.616733	-0.541374	-0.465217	-0.388251	-0.310467	-0.231861
Zr2Mo1O4	-8.81836	-2.24184	-2.10354	-2.02195	-1.94691	-1.87505	-1.8047	-1.73492	-1.66515	-1.59505	-1.5244	-1.45238	-1.37929	-1.30546	-1.23084	-1.15539	-1.07911	-1.00197	-0.923966	-0.845079
Zr2Mo1W1	-10.0607	0.164947	0.118268	0.13914	0.154986	0.168885	0.182316	0.196076	0.210623	0.226235	0.243094	0.262465	0.283713	0.306219	0.330001	0.355074	0.381449	0.409134	0.438138	0.468466
Zr2Mo2O5	-8.79607	-1.97307	-1.83811	-1.75761	-1.68365	-1.61284	-1.54351	-1.47475	-1.40598	-1.33689	-1.26723	-1.19636	-1.12448	-1.05184	-0.978384	-0.904087	-0.828928	-0.75289	-0.67596	-0.59813
Zr2Ta1Mo1	-9.79056	0.158176	0.118797	0.142139	0.160517	0.177	0.19306	0.209481	0.226715	0.245034	0.26461	0.286704	0.31068	0.335913	0.362418	0.390204	0.419277	0.449644	0.481314	0.514293
Zr2Ta1O4	-9.15756	-2.43755	-2.29996	-2.21857	-2.14371	-2.07201	-2.00181	-1.93218	-1.86256	-1.79261	-1.72211	-1.65025	-1.57734	-1.5037	-1.42928	-1.35407	-1.27805	-1.2012	-1.12352	-1.045
Zr2Ta1Ti1	-9.03933	0.121903	0.100161	0.129441	0.153869	0.176511	0.198819	0.221565	0.245194	0.269984	0.296127	0.325223	0.356843	0.38972	0.423873	0.459313	0.49605	0.534096	0.573464	0.61534
Zr2Ta1W1	-10.2451	0.231658	0.178358	0.197068	0.210805	0.222622	0.233988	0.245689	0.258178	0.271728	0.286514	0.303798	0.32294	0.343314	0.364934	0.387804	0.411927	0.437304	0.463939	0.491832
Zr2Ta2O5	-9.19275	-2.14654	-2.01003	-1.92897	-1.8544	-1.78296	-1.71299	-1.64357	-1.57416	-1.50441	-1.43412	-1.36262	-1.29014	-1.21691	-1.14289	-1.06808	-0.992438	-0.915972	-0.838667	-0.760521
Zr2Ti1Mo1	-8.86734	0.0427842	0.0209366	0.0501354	0.0744307	0.0969112	0.119043	0.141605	0.16505	0.18966	0.215633	0.244574	0.276058	0.308824	0.342897	0.378298	0.415045	0.453157	0.492651	0.534719
Zr2Ti1Mo2	-8.67282	0.624895	0.598013	0.625504	0.648046	0.668736	0.689045	0.709753	0.731308	0.75399	0.777988	0.804605	0.833514	0.863715	0.895234	0.928092	0.962305	0.997893	1.03487	1.0742
Zr2Ti1O4	-9.00336	-2.87685	-2.72758	-2.6423	-2.5635	-2.48783	-2.41361	-2.33992	-2.2662	-2.19211	-2.1174	-2.04108	-1.96333	-1.88483	-1.80555	-1.72543	-1.64448	-1.56265	-1.47995	-1.39568
Zr2Ti1W1	-9.32324	0.114914	0.0866872	0.113767	0.135934	0.156262	0.176214	0.196569	0.217781	0.240137	0.263834	0.290477	0.319641	0.350061	0.381762	0.41476	0.44907	0.484705	0.521677	0.561174
Zr2Ti2O5	-8.71411	-2.59111	-2.44527	-2.3611	-2.28335	-2.20867	-2.13539	-2.0626	-1.98976	-1.91651	-1.84261	-1.76712	-1.69005	-1.61221	-1.53356	-1.45406	-1.37368	-1.29242	-1.21025	-1.12611
Zr2W1O4	-8.94681	-2.06856	-1.93482	-1.85474	-1.78123	-1.71091	-1.6421	-1.57389	-1.5057	-1.4372	-1.36815	-1.29774	-1.22629	-1.1541	-1.08114	-1.00738	-0.932792	-0.857374	-0.781112	-0.704
Zr2W2O5	-9.15073	-1.85837	-1.72819	-1.64927	-1.5769	-1.50771	-1.44002	-1.37292	-1.30584	-1.23845	-1.17052	-1.10139	-1.03128	-0.960423	-0.888777	-0.816318	-0.743027	-0.668892	-0.593906	-0.518064

## Sheet: HEA BARTEL PREDICTION WITH SRO
formula	energy	dH	300	400	500	600	700	800	900	1000	1100	1200	1300	1400	1500	1600	1700	1800	1900	2000
Mo10Ta10Ti10W10Zr10	-10.3938	0.0271288	-0.0495648	-0.0695461	-0.0944114	-0.121118	-0.148224	-0.174967	-0.200913	-0.225796	-0.24944	-0.271014	-0.29057	-0.308851	-0.325837	-0.341517	-0.355881	-0.368923	-0.380635	-0.390069
Mo10Ta10Ti10W15Zr5	-10.8714	-0.0094226	-0.0897159	-0.110541	-0.13634	-0.164038	-0.192179	-0.219995	-0.247052	-0.273086	-0.297919	-0.320956	-0.342109	-0.361989	-0.380574	-0.397854	-0.413822	-0.428472	-0.441798	-0.452855
Mo10Ta10Ti10W5Zr15	-9.92237	0.0575306	-0.0110681	-0.029919	-0.0533561	-0.0784743	-0.103888	-0.128863	-0.152978	-0.175975	-0.197679	-0.217031	-0.234224	-0.250136	-0.264747	-0.278046	-0.290024	-0.300673	-0.309982	-0.317003
Mo10Ta10Ti15W10Zr5	-10.3622	-0.006447	-0.0828351	-0.102301	-0.126698	-0.152945	-0.179588	-0.205867	-0.231351	-0.25577	-0.278944	-0.300139	-0.319184	-0.336946	-0.353401	-0.368537	-0.382343	-0.394809	-0.405926	-0.414274
Mo10Ta10Ti15W5Zr10	-9.87681	0.03787	-0.0329839	-0.0514306	-0.0746385	-0.0995982	-0.124888	-0.14976	-0.173789	-0.19671	-0.218338	-0.237712	-0.254799	-0.2706	-0.285092	-0.298261	-0.310096	-0.320585	-0.329718	-0.336073
Mo10Ta10Ti5W10Zr15	-10.4244	0.0617196	-0.00999891	-0.0301895	-0.0549671	-0.0814546	-0.108271	-0.134682	-0.160265	-0.184766	-0.208018	-0.229098	-0.248283	-0.266196	-0.282819	-0.298144	-0.312165	-0.324878	-0.336277	-0.345887
Mo10Ta10Ti5W15Zr10	-10.8962	0.0310222	-0.0479604	-0.0688366	-0.0946263	-0.122301	-0.150416	-0.178207	-0.205236	-0.231241	-0.256051	-0.278974	-0.300143	-0.320048	-0.338669	-0.355998	-0.37203	-0.38676	-0.400186	-0.411834
Mo10Ta15Ti10W10Zr5	-10.7581	-0.0061664	-0.0835774	-0.103391	-0.128161	-0.154811	-0.181887	-0.208628	-0.2346	-0.259541	-0.283278	-0.305216	-0.325269	-0.344049	-0.361536	-0.377722	-0.392603	-0.406171	-0.418422	-0.428411
Mo10Ta15Ti10W5Zr10	-10.2723	0.0386392	-0.0330879	-0.0518431	-0.0753816	-0.100703	-0.126383	-0.151674	-0.176148	-0.199547	-0.221696	-0.241769	-0.25982	-0.276595	-0.292075	-0.30625	-0.319116	-0.330664	-0.340887	-0.348839
Mo10Ta15Ti15W5Zr5	-10.2382	0.0075324	-0.0646563	-0.0827015	-0.105655	-0.130437	-0.155598	-0.180382	-0.20436	-0.227268	-0.248924	-0.268599	-0.286123	-0.302365	-0.317301	-0.330922	-0.343218	-0.354181	-0.363802	-0.37066
Mo10Ta15Ti5W10Zr10	-10.7867	0.0304534	-0.0456616	-0.0655416	-0.090315	-0.116955	-0.144019	-0.170745	-0.1967	-0.221624	-0.24535	-0.267184	-0.287266	-0.306082	-0.323616	-0.339862	-0.354817	-0.368477	-0.380839	-0.391429
Mo10Ta15Ti5W15Zr5	-11.2808	-0.0226078	-0.102065	-0.122906	-0.148696	-0.176391	-0.204545	-0.232394	-0.259505	-0.28562	-0.310576	-0.333912	-0.355627	-0.376077	-0.395245	-0.413127	-0.429719	-0.44502	-0.459029	-0.471276
Mo10Ta15Ti5W5Zr15	-10.3187	0.057396	-0.0107693	-0.0293848	-0.0526272	-0.0775908	-0.102885	-0.12777	-0.151826	-0.174797	-0.196519	-0.216068	-0.233725	-0.25011	-0.265209	-0.279015	-0.291524	-0.302732	-0.312633	-0.320752
Mo10Ta5Ti10W10Zr15	-10.0275	0.062419	-0.00832323	-0.0282757	-0.0527752	-0.0789447	-0.105409	-0.131436	-0.156607	-0.180662	-0.203424	-0.223834	-0.242084	-0.259051	-0.274714	-0.28906	-0.302079	-0.31376	-0.324096	-0.332136
Mo10Ta5Ti10W15Zr10	-10.4939	0.0370812	-0.0404746	-0.0611415	-0.0866512	-0.113991	-0.141728	-0.169103	-0.195685	-0.221205	-0.245487	-0.267698	-0.287891	-0.306807	-0.324425	-0.340731	-0.355715	-0.369369	-0.381686	-0.391719
Mo10Ta5Ti15W10Zr10	-10.0028	0.0219422	-0.0526916	-0.0718303	-0.0958547	-0.121702	-0.147925	-0.173762	-0.198778	-0.222701	-0.245343	-0.265737	-0.283849	-0.300678	-0.316198	-0.330393	-0.34325	-0.354757	-0.364901	-0.372262
Mo10Ta5Ti15W15Zr5	-10.4751	-0.009354	-0.0872179	-0.107219	-0.132172	-0.158992	-0.186225	-0.213107	-0.239203	-0.264241	-0.288038	-0.309859	-0.329531	-0.34792	-0.365	-0.380757	-0.395178	-0.408252	-0.419972	-0.428916
Mo10Ta5Ti15W5Zr15	-9.52035	0.06332	-0.00240484	-0.0207018	-0.0434906	-0.0678935	-0.0925417	-0.116711	-0.139985	-0.162102	-0.182879	-0.201122	-0.216939	-0.231462	-0.24467	-0.256545	-0.267075	-0.276246	-0.284045	-0.28905
Mo10Ta5Ti5W15Zr15	-10.5329	0.0633398	-0.0097744	-0.0305165	-0.055858	-0.0829241	-0.110334	-0.137348	-0.163544	-0.188664	-0.212539	-0.234244	-0.254055	-0.272593	-0.28984	-0.305784	-0.320419	-0.333739	-0.345738	-0.355942
Mo15Ta10Ti10W10Zr5	-10.6702	-0.0194988	-0.0988286	-0.119517	-0.145145	-0.172647	-0.200571	-0.228154	-0.254965	-0.28074	-0.305305	-0.328063	-0.348927	-0.368507	-0.386781	-0.403737	-0.419367	-0.433663	-0.446616	-0.45728
Mo15Ta10Ti10W5Zr10	-10.1906	0.0190682	-0.0560573	-0.0752979	-0.099457	-0.125467	-0.151875	-0.177916	-0.203156	-0.227326	-0.25025	-0.271098	-0.28992	-0.307459	-0.323693	-0.338608	-0.352196	-0.364445	-0.375346	-0.38395
Mo15Ta10Ti15W5Zr5	-10.1738	-0.0293504	-0.102875	-0.121889	-0.145745	-0.171397	-0.197411	-0.223034	-0.247842	-0.27157	-0.294037	-0.314514	-0.332829	-0.349848	-0.365549	-0.379916	-0.392937	-0.404602	-0.4149	-0.422407
Mo15Ta10Ti5W10Zr10	-10.7008	0.0151828	-0.063909	-0.0844029	-0.109879	-0.137267	-0.165105	-0.192619	-0.219372	-0.245097	-0.269623	-0.292256	-0.31313	-0.332731	-0.351039	-0.368044	-0.383739	-0.398118	-0.411174	-0.422433
Mo15Ta10Ti5W15Zr5	-11.1839	-0.0269386	-0.108526	-0.13021	-0.156844	-0.185385	-0.214385	-0.243079	-0.271034	-0.297989	-0.323779	-0.347943	-0.370478	-0.391737	-0.411702	-0.430363	-0.447715	-0.463753	-0.478475	-0.491407
Mo15Ta10Ti5W5Zr15	-10.2219	0.0530588	-0.01783	-0.0371313	-0.0611217	-0.0868651	-0.112957	-0.13865	-0.163519	-0.187305	-0.20984	-0.230198	-0.248658	-0.265837	-0.281719	-0.296292	-0.309549	-0.321483	-0.332086	-0.340881
Mo15Ta15Ti10W5Zr5	-10.5543	-0.0136012	-0.0888717	-0.108065	-0.132194	-0.158187	-0.184591	-0.210645	-0.235919	-0.260152	-0.283171	-0.304381	-0.323697	-0.34173	-0.358459	-0.373875	-0.38797	-0.400737	-0.412169	-0.421318
Mo15Ta15Ti5W10Zr5	-11.0624	-0.0154726	-0.0946141	-0.11516	-0.140684	-0.168121	-0.196014	-0.223597	-0.250437	-0.276274	-0.300945	-0.32399	-0.345405	-0.365547	-0.384397	-0.401948	-0.418197	-0.43314	-0.446772	-0.458622
Mo15Ta15Ti5W5Zr10	-10.5856	0.020308	-0.0543531	-0.0734554	-0.0974984	-0.123423	-0.149776	-0.175789	-0.201027	-0.225229	-0.248227	-0.269328	-0.288668	-0.306735	-0.32351	-0.338985	-0.353157	-0.366018	-0.377563	-0.387317
Mo15Ta5Ti10W10Zr10	-10.2963	0.0233782	-0.0543929	-0.0746468	-0.0998237	-0.126862	-0.154311	-0.181403	-0.207701	-0.232935	-0.256927	-0.278844	-0.298736	-0.317344	-0.334645	-0.350623	-0.365267	-0.378566	-0.390511	-0.400151
Mo15Ta5Ti10W15Zr5	-10.7873	-0.026558	-0.107095	-0.128395	-0.154625	-0.182733	-0.211271	-0.239477	-0.266916	-0.293324	-0.318524	-0.341919	-0.36342	-0.383636	-0.402544	-0.420129	-0.436381	-0.451292	-0.464855	-0.476121
Mo15Ta5Ti10W5Zr15	-9.83835	0.0403326	-0.0309093	-0.0496298	-0.0731341	-0.0984188	-0.124056	-0.149288	-0.173682	-0.196971	-0.218973	-0.238626	-0.256118	-0.272324	-0.28722	-0.300791	-0.313025	-0.323909	-0.333431	-0.340639
Mo15Ta5Ti15W10Zr5	-10.2812	-0.0266568	-0.103183	-0.123116	-0.147933	-0.174575	-0.2016	-0.228252	-0.2541	-0.278877	-0.302399	-0.323934	-0.343309	-0.361389	-0.378148	-0.393571	-0.407642	-0.420351	-0.431686	-0.440224
Mo15Ta5Ti15W5Zr10	-9.79819	0.0152726	-0.057652	-0.0760797	-0.0994142	-0.124574	-0.150106	-0.175245	-0.199557	-0.222768	-0.244691	-0.264359	-0.281737	-0.297822	-0.312588	-0.326018	-0.338095	-0.348807	-0.358139	-0.364667
Mo15Ta5Ti5W10Zr15	-10.3259	0.0590094	-0.0140138	-0.0344534	-0.0595362	-0.0863574	-0.113524	-0.140293	-0.16624	-0.191106	-0.21472	-0.236158	-0.255696	-0.273951	-0.290905	-0.306546	-0.320864	-0.333851	-0.345501	-0.355335
Mo15Ta5Ti5W15Zr10	-10.8043	0.0216402	-0.0587895	-0.0798838	-0.105961	-0.133959	-0.162417	-0.190562	-0.217951	-0.244319	-0.269491	-0.292771	-0.314293	-0.334541	-0.353494	-0.371139	-0.387469	-0.402475	-0.416152	-0.428026
Mo5Ta10Ti10W10Zr15	-10.1228	0.0683222	0.000570606	-0.0187853	-0.0425954	-0.0680285	-0.0937296	-0.118978	-0.143362	-0.166624	-0.188594	-0.208215	-0.225681	-0.241872	-0.256769	-0.270365	-0.282652	-0.293623	-0.303272	-0.310651
Mo5Ta10Ti10W15Zr10	-10.5834	0.0487436	-0.025539	-0.0456689	-0.0705224	-0.0971456	-0.124132	-0.150737	-0.176535	-0.201267	-0.224757	-0.246178	-0.265586	-0.283724	-0.300573	-0.316126	-0.330375	-0.343315	-0.354942	-0.364309
Mo5Ta10Ti15W10Zr10	-10.0667	0.05921	-0.0100876	-0.0292518	-0.0529681	-0.0783397	-0.103992	-0.1292	-0.153549	-0.17678	-0.198716	-0.218396	-0.235791	-0.251904	-0.266713	-0.280208	-0.29238	-0.30322	-0.312719	-0.319458
Mo5Ta10Ti15W15Zr5	-10.5618	0.0051358	-0.0705745	-0.0897875	-0.11394	-0.139953	-0.166375	-0.192445	-0.217729	-0.241959	-0.264951	-0.285974	-0.304856	-0.322465	-0.338779	-0.353785	-0.367475	-0.379841	-0.390876	-0.399163
Mo5Ta10Ti15W5Zr15	-9.60042	0.0844742	0.0240785	0.00574622	-0.0167432	-0.0406786	-0.0647636	-0.0883107	-0.110925	-0.132358	-0.152436	-0.169972	-0.185078	-0.198892	-0.211395	-0.222577	-0.232429	-0.240941	-0.248102	-0.252491
Mo5Ta10Ti5W15Zr15	-10.6235	0.0738758	0.00447808	-0.0158133	-0.0405448	-0.0669206	-0.093594	-0.119845	-0.145261	-0.169591	-0.192672	-0.213582	-0.232602	-0.250354	-0.266824	-0.282006	-0.295896	-0.308492	-0.31979	-0.329317
Mo5Ta15Ti10W10Zr10	-10.4822	0.03992	-0.0323	-0.0512486	-0.0749784	-0.100498	-0.126386	-0.151895	-0.176597	-0.20023	-0.222623	-0.242949	-0.261262	-0.278307	-0.294068	-0.308538	-0.321711	-0.333582	-0.344147	-0.352459
Mo5Ta15Ti10W15Zr5	-10.9551	0.0080706	-0.068636	-0.0882009	-0.112727	-0.139144	-0.165999	-0.19253	-0.218302	-0.243052	-0.266608	-0.288373	-0.308262	-0.326887	-0.344231	-0.360286	-0.375049	-0.388516	-0.400684	-0.41061
Mo5Ta15Ti10W5Zr15	-10.0045	0.076628	0.0141122	-0.00412239	-0.0266772	-0.0507792	-0.0751005	-0.0989363	-0.121883	-0.143694	-0.1642	-0.182348	-0.198338	-0.213049	-0.226466	-0.238583	-0.249396	-0.258898	-0.267083	-0.273004
Mo5Ta15Ti15W10Zr5	-10.4405	0.0164564	-0.0561518	-0.0744436	-0.0976282	-0.122642	-0.14804	-0.17307	-0.1973	-0.220467	-0.242391	-0.262342	-0.28015	-0.296684	-0.311924	-0.32586	-0.338485	-0.349793	-0.359776	-0.367016
Mo5Ta15Ti15W5Zr10	-9.9632	0.0526984	-0.0133037	-0.0308571	-0.0530235	-0.0768668	-0.100998	-0.124686	-0.147515	-0.169227	-0.189643	-0.207804	-0.223683	-0.238281	-0.25158	-0.26357	-0.274244	-0.283593	-0.291609	-0.296872
Mo5Ta15Ti5W10Zr15	-10.5139	0.0734776	0.00687714	-0.0124217	-0.0361439	-0.0614933	-0.0871251	-0.112322	-0.136675	-0.159935	-0.181942	-0.201776	-0.219719	-0.236394	-0.251789	-0.2659	-0.278725	-0.290262	-0.300507	-0.308989
Mo5Ta15Ti5W15Zr10	-10.9809	0.0475144	-0.0265358	-0.0464594	-0.0711539	-0.0976613	-0.124568	-0.151126	-0.176908	-0.201656	-0.225208	-0.246871	-0.266786	-0.285442	-0.302823	-0.318927	-0.333752	-0.347296	-0.359559	-0.370068
Mo5Ta5Ti10W15Zr15	-10.2262	0.0749476	0.00660802	-0.013466	-0.0379319	-0.0639982	-0.090325	-0.116198	-0.141205	-0.165091	-0.187684	-0.207927	-0.226013	-0.242821	-0.258333	-0.272537	-0.285425	-0.296991	-0.307226	-0.315185
Mo5Ta5Ti15W10Zr15	-9.71569	0.0792304	0.0152437	-0.00379335	-0.0270991	-0.0519151	-0.0769231	-0.101422	-0.125009	-0.147429	-0.168505	-0.187044	-0.203158	-0.217983	-0.231497	-0.243687	-0.254542	-0.264052	-0.272206	-0.277583
Mo5Ta5Ti15W15Zr10	-10.1876	0.048353	-0.0236879	-0.0430364	-0.0670893	-0.0928823	-0.11901	-0.144729	-0.169616	-0.193402	-0.215905	-0.236161	-0.254138	-0.270835	-0.286231	-0.300311	-0.313064	-0.324479	-0.334549	-0.341854

## Sheet: HEA BARTEL PREDICTION WITHOUT SRO
formula	energy	dH	300	400	500	600	700	800	900	1000	1100	1200	1300	1400	1500	1600	1700	1800	1900	2000
Mo10Ta10Ti10W10Zr10	-10.3938	0.0271288	-0.0152728	0.00705101	0.0244153	0.0399	0.0549644	0.0703783	0.0865797	0.103838	0.122331	0.142891	0.165465	0.189312	0.214453	0.240899	0.268659	0.29774	0.328152	0.36084
Mo10Ta10Ti10W15Zr5	-10.8714	-0.0094226	-0.0561452	-0.0352768	-0.0193943	-0.00541639	0.00811561	0.0219693	0.0365805	0.0522151	0.0690486	0.0876778	0.108191	0.129977	0.153057	0.177442	0.203139	0.230154	0.258493	0.2891
Mo10Ta10Ti10W5Zr15	-9.92237	0.0575306	0.0191529	0.0428332	0.0615802	0.0784728	0.0949706	0.111846	0.129538	0.148321	0.168375	0.190766	0.215303	0.241112	0.268214	0.296622	0.326346	0.357395	0.38978	0.424449
Mo10Ta10Ti15W10Zr5	-10.3622	-0.006447	-0.0492	-0.0269882	-0.00971356	0.00570929	0.0207337	0.036121	0.0523037	0.0695496	0.0880415	0.108511	0.131131	0.155034	0.180243	0.206771	0.234629	0.263828	0.294375	0.327691
Mo10Ta10Ti15W5Zr10	-9.87681	0.03787	-0.000790038	0.0228012	0.0414816	0.0583353	0.0748162	0.0916876	0.109385	0.128178	0.148254	0.170578	0.195183	0.221071	0.248264	0.276777	0.306623	0.337811	0.370355	0.405676
Mo10Ta10Ti5W10Zr15	-10.4244	0.0617196	0.0197428	0.0422032	0.0596817	0.0752528	0.0903817	0.105847	0.122091	0.139386	0.157905	0.178579	0.201133	0.224949	0.250046	0.276434	0.30412	0.33311	0.363409	0.395494
Mo10Ta10Ti5W15Zr10	-10.8962	0.0310222	-0.0152171	0.00580727	0.0218234	0.0359071	0.049523	0.0634472	0.0781211	0.0938117	0.110691	0.129454	0.149966	0.17174	0.194796	0.219143	0.244785	0.271728	0.299974	0.329998
Mo10Ta15Ti10W10Zr5	-10.7581	-0.0061664	-0.0499458	-0.0280811	-0.0111779	0.00384168	0.0184328	0.0333592	0.0490533	0.0657779	0.0837062	0.103433	0.125045	0.14793	0.172107	0.197585	0.224369	0.252465	0.281878	0.313554
Mo10Ta15Ti10W5Zr10	-10.2723	0.0386392	-0.000915375	0.0223727	0.0407257	0.0572201	0.0733116	0.0897661	0.107018	0.125334	0.144891	0.166516	0.190157	0.215071	0.241277	0.268784	0.297599	0.327729	0.359183	0.392907
Mo10Ta15Ti15W5Zr5	-10.2382	0.0075324	-0.0323688	-0.00919121	0.00907367	0.0255077	0.0415608	0.0579903	0.0752255	0.093531	0.113087	0.134624	0.158312	0.183283	0.209559	0.237149	0.266065	0.296313	0.327904	0.362258
Mo10Ta15Ti5W10Zr10	-10.7867	0.0304534	-0.0128754	0.00913447	0.0261605	0.041275	0.0559392	0.0709252	0.0866712	0.103441	0.121404	0.141254	0.162853	0.185716	0.209858	0.235287	0.262006	0.290018	0.319328	0.350409
Mo10Ta15Ti5W15Zr5	-11.2808	-0.0226078	-0.070348	-0.0498237	-0.0343097	-0.0207322	-0.00763056	0.00576517	0.0198907	0.035007	0.0512798	0.069169	0.0886773	0.109448	0.1315	0.154838	0.179463	0.205379	0.232587	0.261557
Mo10Ta15Ti5W5Zr15	-10.3187	0.057396	0.0182588	0.041681	0.0601456	0.0767239	0.0928774	0.10938	0.126674	0.145024	0.164603	0.18634	0.209958	0.234839	0.260999	0.288445	0.317184	0.347219	0.378559	0.411677
Mo10Ta5Ti10W10Zr15	-10.0275	0.062419	0.0212602	0.0439983	0.0617786	0.0776835	0.0931764	0.109033	0.125697	0.143443	0.162456	0.183804	0.207296	0.23206	0.25812	0.285489	0.314179	0.344201	0.375565	0.409221
Mo10Ta5Ti10W15Zr10	-10.4939	0.0370812	-0.0081964	0.0131536	0.0295195	0.0439849	0.0580127	0.0723762	0.0875171	0.103707	0.121128	0.140613	0.162111	0.184882	0.208948	0.234323	0.261018	0.289041	0.3184	0.350043
Mo10Ta5Ti15W10Zr10	-10.0028	0.0219422	-0.019498	0.00315127	0.0208652	0.0367316	0.0522077	0.0680608	0.0847291	0.102487	0.121522	0.142803	0.166364	0.191207	0.217357	0.244832	0.273644	0.303807	0.33533	0.369637
Mo10Ta5Ti15W15Zr5	-10.4751	-0.009354	-0.054989	-0.0337531	-0.0174789	-0.00307737	0.0109083	0.0252433	0.0403635	0.0565397	0.0739571	0.0933496	0.114891	0.137715	0.161847	0.187303	0.214095	0.242232	0.271726	0.303994
Mo10Ta5Ti15W5Zr15	-9.52035	0.06332	0.0257577	0.0497148	0.0687629	0.0859884	0.102849	0.120115	0.138226	0.157459	0.178007	0.20107	0.226545	0.253301	0.281365	0.310753	0.34148	0.373561	0.40701	0.44325
Mo10Ta5Ti5W15Zr15	-10.5329	0.0633398	0.0184882	0.0399751	0.0564556	0.0710078	0.0851004	0.0995154	0.1147	0.130927	0.148375	0.167974	0.189452	0.212192	0.236215	0.261533	0.288154	0.316085	0.345333	0.376373
Mo15Ta10Ti10W10Zr5	-10.6702	-0.0194988	-0.0655694	-0.0444865	-0.0283862	-0.0141807	-0.000409944	0.0136934	0.0285641	0.0444672	0.0615779	0.0804931	0.101301	0.123392	0.146788	0.1715	0.197539	0.224912	0.253626	0.284629
Mo15Ta10Ti10W5Zr10	-10.1906	0.0190682	-0.0227439	-0.000226469	0.0173348	0.0330263	0.0483087	0.0639514	0.0803915	0.0978972	0.116647	0.137472	0.16032	0.184451	0.209887	0.23664	0.26472	0.294138	0.324904	0.357967
Mo15Ta10Ti15W5Zr5	-10.1738	-0.0293504	-0.071453	-0.0490273	-0.0315353	-0.0158854	-0.00062272	0.0150137	0.0314554	0.0489693	0.0677379	0.0884931	0.111407	0.135614	0.161138	0.187993	0.216193	0.245748	0.27667	0.310381
Mo15Ta10Ti5W10Zr10	-10.7008	0.0151828	-0.030443	-0.00921699	0.00700414	0.0213026	0.0351446	0.0493056	0.0642262	0.0801725	0.0973159	0.116352	0.137146	0.159212	0.182571	0.207233	0.233204	0.260491	0.2891	0.319506
Mo15Ta10Ti5W15Zr5	-11.1839	-0.0269386	-0.0770056	-0.0572751	-0.0425758	-0.0298242	-0.0175548	-0.00499399	0.00829623	0.0225791	0.0380225	0.0550881	0.0737807	0.0937459	0.115004	0.137565	0.161433	0.186613	0.21311	0.241395
Mo15Ta10Ti5W5Zr15	-10.2219	0.0530588	0.0116099	0.0342433	0.0518982	0.0676555	0.0829818	0.098655	0.115118	0.132639	0.151395	0.172313	0.19512	0.2192	0.244571	0.271246	0.299231	0.328537	0.359171	0.39161
Mo15Ta15Ti10W5Zr5	-10.5543	-0.0136012	-0.056751	-0.0346793	-0.0175657	-0.00232597	0.0124965	0.027665	0.0436112	0.060597	0.078795	0.0988003	0.1207	0.143882	0.168367	0.194165	0.221284	0.24973	0.279511	0.311575
Mo15Ta15Ti5W10Zr5	-11.0624	-0.0154726	-0.0625663	-0.0418294	-0.0260994	-0.0122961	0.00104248	0.014686	0.0290692	0.0444522	0.0610004	0.0791738	0.0989751	0.120049	0.142415	0.166078	0.191043	0.217315	0.244896	0.27426
Mo15Ta15Ti5W5Zr10	-10.5856	0.020308	-0.0224167	-0.000208464	0.0170194	0.0323455	0.0472325	0.0624522	0.0784417	0.095464	0.113688	0.133808	0.155687	0.178838	0.20328	0.22902	0.256064	0.284418	0.314088	0.345548
Mo15Ta5Ti10W10Zr10	-10.2963	0.0233782	-0.0212787	0.000275259	0.0168486	0.0315312	0.0457873	0.0603901	0.0757801	0.0922284	0.109916	0.129676	0.151459	0.174524	0.198895	0.224588	0.251614	0.279984	0.309708	0.341736
Mo15Ta5Ti10W15Zr5	-10.7873	-0.026558	-0.0755242	-0.0554218	-0.0403264	-0.0271467	-0.0144192	-0.00137265	0.0124309	0.0272598	0.0432916	0.061125	0.0808502	0.101858	0.124172	0.147808	0.172775	0.199083	0.226738	0.256689
Mo15Ta5Ti10W5Zr15	-9.83835	0.0403326	-0.000280586	0.0226364	0.0405991	0.0566961	0.0723923	0.0884628	0.105351	0.12333	0.142585	0.164183	0.187935	0.212968	0.239308	0.266969	0.295965	0.32631	0.358014	0.39203
Mo15Ta5Ti15W10Zr5	-10.2812	-0.0266568	-0.0715958	-0.0501309	-0.0336241	-0.0189803	-0.00474115	0.00985818	0.0252525	0.0417119	0.0594213	0.0791144	0.100965	0.124109	0.148571	0.174369	0.201517	0.230027	0.25991	0.292589
Mo15Ta5Ti15W5Zr10	-9.79819	0.0152726	-0.0255684	-0.00272229	0.0151919	0.0312683	0.0469656	0.0630507	0.079961	0.0979694	0.117264	0.138814	0.162652	0.187782	0.21423	0.242015	0.271152	0.301654	0.333535	0.36822
Mo15Ta5Ti5W10Zr15	-10.3259	0.0590094	0.0147203	0.0363918	0.0530603	0.0678102	0.0821118	0.0967466	0.112161	0.128627	0.146322	0.166177	0.18792	0.210935	0.235243	0.260859	0.287792	0.316051	0.345644	0.37705
Mo15Ta5Ti5W15Zr10	-10.8043	0.0216402	-0.0269193	-0.0066864	0.00851714	0.0217771	0.0345631	0.0476546	0.0614954	0.0763548	0.0924066	0.110348	0.130047	0.151017	0.173282	0.196854	0.221741	0.24795	0.275488	0.30483
Mo5Ta10Ti10W10Zr15	-10.1228	0.0683222	0.0294368	0.0529508	0.071528	0.0882411	0.104548	0.121222	0.138703	0.157265	0.17709	0.199243	0.223533	0.249086	0.275921	0.304049	0.333479	0.364219	0.396276	0.430599
Mo5Ta10Ti10W15Zr10	-10.5834	0.0487436	0.00575829	0.0278905	0.0450597	0.0603396	0.075188	0.090375	0.10634	0.123352	0.141591	0.161887	0.18419	0.207755	0.232603	0.258744	0.286185	0.314932	0.34499	0.377305
Mo5Ta10Ti15W10Zr10	-10.0667	0.05921	0.0199821	0.0433869	0.0618775	0.0785316	0.0948018	0.111452	0.128917	0.14747	0.167296	0.189363	0.213701	0.239312	0.266218	0.294432	0.323963	0.354823	0.387019	0.421972
Mo5Ta10Ti15W15Zr5	-10.5618	0.0051358	-0.0382556	-0.0162536	0.000807643	0.0160074	0.0307976	0.0459398	0.0618675	0.0788494	0.0970686	0.117257	0.139586	0.163189	0.188087	0.214292	0.241813	0.270659	0.300835	0.33376
Mo5Ta10Ti15W5Zr15	-9.60042	0.0844742	0.0491042	0.0738102	0.0936282	0.111635	0.129283	0.147339	0.16624	0.186262	0.207594	0.231436	0.257682	0.285199	0.314012	0.344132	0.375572	0.408344	0.442458	0.479337
Mo5Ta10Ti5W15Zr15	-10.6235	0.0738758	0.0313586	0.0536418	0.0709395	0.0863202	0.101248	0.1165	0.132522	0.149586	0.167865	0.18829	0.210586	0.234135	0.258954	0.285051	0.312433	0.341102	0.371063	0.40279
Mo5Ta15Ti10W10Zr10	-10.4822	0.03992	-0.000182342	0.0229261	0.0410959	0.0573975	0.0732849	0.0895245	0.106552	0.124634	0.143948	0.165322	0.188703	0.213347	0.239272	0.266486	0.294994	0.324802	0.355915	0.389278
Mo5Ta15Ti10W15Zr5	-10.9551	0.0080706	-0.0363424	-0.014686	0.00200553	0.0168036	0.0311621	0.0458449	0.0612857	0.0777479	0.0954051	0.114852	0.136175	0.158761	0.18263	0.207786	0.234235	0.26198	0.291023	0.322309
Mo5Ta15Ti10W5Zr15	-10.0045	0.076628	0.0405254	0.0649821	0.0845267	0.102228	0.119541	0.137233	0.155744	0.175343	0.196209	0.219406	0.244742	0.27134	0.299218	0.328386	0.35885	0.390617	0.423695	0.459032
Mo5Ta15Ti15W10Zr5	-10.4405	0.0164564	-0.0240524	-0.00107443	0.0169874	0.0332087	0.0490378	0.0652324	0.0822228	0.100275	0.119568	0.140834	0.164242	0.188923	0.214898	0.242176	0.270764	0.30067	0.331901	0.365873
Mo5Ta15Ti15W5Zr10	-9.9632	0.0526984	0.0162607	0.0406108	0.0600711	0.077716	0.0949942	0.112666	0.131163	0.150755	0.171625	0.194738	0.220124	0.246783	0.274735	0.303991	0.334559	0.366448	0.399668	0.435638
Mo5Ta15Ti5W10Zr15	-10.5139	0.0734776	0.0338346	0.0570911	0.0753866	0.091786	0.107749	0.124052	0.141134	0.159264	0.178615	0.200115	0.223487	0.248111	0.274005	0.301172	0.329618	0.359345	0.390357	0.423129
Mo5Ta15Ti5W15Zr10	-10.9809	0.0475144	0.00363359	0.0254623	0.0423038	0.057224	0.0716828	0.0864524	0.101972	0.118507	0.136226	0.155823	0.177161	0.199752	0.223612	0.248747	0.275157	0.302845	0.331813	0.362532
Mo5Ta5Ti10W15Zr15	-10.2262	0.0749476	0.0332479	0.0558085	0.073408	0.0891224	0.104413	0.120057	0.136498	0.154013	0.172787	0.193885	0.217119	0.241616	0.267397	0.294475	0.322861	0.352563	0.383589	0.416886
Mo5Ta5Ti15W10Zr15	-9.71569	0.0792304	0.0411393	0.064923	0.0837942	0.100833	0.117496	0.134553	0.152446	0.171452	0.191763	0.214582	0.239802	0.266295	0.294084	0.323186	0.353613	0.385377	0.418491	0.454376
Mo5Ta5Ti15W15Zr10	-10.1876	0.048353	0.0063022	0.0287509	0.0462608	0.0619133	0.0771645	0.0927817	0.109204	0.126707	0.145479	0.166488	0.189767	0.21432	0.240169	0.26733	0.295814	0.325632	0.356794	0.390719
