# Supplementary material for: High throughput exploration of the oxidation landscape in high entropy alloys
Source: Royal Society of Chemistry journal article supplement (doi:10.1039/d2mh00729k), 2022-01-01
Supplement: d2mh00729k4.zip [file d2mh00729k4.zip]

## Sheet: HEA GS
formula	HEA #	energy	dH	volume_pa
Mo10Ta10Ti10W10Zr10	HEA 0	-10.3938	0.0271288	17.6668
Mo10Ta10Ti10W15Zr5	HEA 1	-10.8714	-0.0094226	16.9623
Mo10Ta10Ti10W5Zr15	HEA 2	-9.92237	0.0575306	18.4664
Mo10Ta10Ti15W10Zr5	HEA 3	-10.3622	-0.006447	17.1208
Mo10Ta10Ti15W5Zr10	HEA 4	-9.87681	0.03787	17.8824
Mo10Ta10Ti5W10Zr15	HEA 5	-10.4244	0.0617196	18.2581
Mo10Ta10Ti5W15Zr10	HEA 6	-10.8962	0.0310222	17.4881
Mo10Ta15Ti10W10Zr5	HEA 7	-10.7581	-0.0061664	17.2611
Mo10Ta15Ti10W5Zr10	HEA 8	-10.2723	0.0386392	17.9729
Mo10Ta15Ti15W5Zr5	HEA 9	-10.2382	0.0075324	17.4215
Mo10Ta15Ti5W10Zr10	HEA 10	-10.7867	0.0304534	17.7418
Mo10Ta15Ti5W15Zr5	HEA 11	-11.2808	-0.0226078	17.1099
Mo10Ta15Ti5W5Zr15	HEA 12	-10.3187	0.057396	18.5718
Mo10Ta5Ti10W10Zr15	HEA 13	-10.0275	0.062419	18.0935
Mo10Ta5Ti10W15Zr10	HEA 14	-10.4939	0.0370812	17.3545
Mo10Ta5Ti15W10Zr10	HEA 15	-10.0028	0.0219422	17.5822
Mo10Ta5Ti15W15Zr5	HEA 16	-10.4751	-0.009354	16.8129
Mo10Ta5Ti15W5Zr15	HEA 17	-9.52035	0.06332	18.3051
Mo10Ta5Ti5W15Zr15	HEA 18	-10.5329	0.0633398	17.9179
Mo15Ta10Ti10W10Zr5	HEA 19	-10.6702	-0.0194988	16.9351
Mo15Ta10Ti10W5Zr10	HEA 20	-10.1906	0.0190682	17.6682
Mo15Ta10Ti15W5Zr5	HEA 21	-10.1738	-0.0293504	17.1315
Mo15Ta10Ti5W10Zr10	HEA 22	-10.7008	0.0151828	17.4992
Mo15Ta10Ti5W15Zr5	HEA 23	-11.1839	-0.0269386	16.8442
Mo15Ta10Ti5W5Zr15	HEA 24	-10.2219	0.0530588	18.2492
Mo15Ta15Ti10W5Zr5	HEA 25	-10.5543	-0.0136012	17.2537
Mo15Ta15Ti5W10Zr5	HEA 26	-11.0624	-0.0154726	17.1058
Mo15Ta15Ti5W5Zr10	HEA 27	-10.5856	0.020308	17.7977
Mo15Ta5Ti10W10Zr10	HEA 28	-10.2963	0.0233782	17.3479
Mo15Ta5Ti10W15Zr5	HEA 29	-10.7873	-0.026558	16.7125
Mo15Ta5Ti10W5Zr15	HEA 30	-9.83835	0.0403326	18.0958
Mo15Ta5Ti15W10Zr5	HEA 31	-10.2812	-0.0266568	16.8575
Mo15Ta5Ti15W5Zr10	HEA 32	-9.79819	0.0152726	17.5448
Mo15Ta5Ti5W10Zr15	HEA 33	-10.3259	0.0590094	17.9147
Mo15Ta5Ti5W15Zr10	HEA 34	-10.8043	0.0216402	17.1921
Mo5Ta10Ti10W10Zr15	HEA 35	-10.1228	0.0683222	18.4836
Mo5Ta10Ti10W15Zr10	HEA 36	-10.5834	0.0487436	17.6808
Mo5Ta10Ti15W10Zr10	HEA 37	-10.0667	0.05921	17.873
Mo5Ta10Ti15W15Zr5	HEA 38	-10.5618	0.0051358	17.1441
Mo5Ta10Ti15W5Zr15	HEA 39	-9.60042	0.0844742	18.6695
Mo5Ta10Ti5W15Zr15	HEA 40	-10.6235	0.0738758	18.228
Mo5Ta15Ti10W10Zr10	HEA 41	-10.4822	0.03992	18.005
Mo5Ta15Ti10W15Zr5	HEA 42	-10.9551	0.0080706	17.2597
Mo5Ta15Ti10W5Zr15	HEA 43	-10.0045	0.076628	18.7882
Mo5Ta15Ti15W10Zr5	HEA 44	-10.4405	0.0164564	17.4447
Mo5Ta15Ti15W5Zr10	HEA 45	-9.9632	0.0526984	18.2155
Mo5Ta15Ti5W10Zr15	HEA 46	-10.5139	0.0734776	18.5483
Mo5Ta15Ti5W15Zr10	HEA 47	-10.9809	0.0475144	17.7898
Mo5Ta5Ti10W15Zr15	HEA 48	-10.2262	0.0749476	18.1204
Mo5Ta5Ti15W10Zr15	HEA 49	-9.71569	0.0792304	18.3438
Mo5Ta5Ti15W15Zr10	HEA 50	-10.1876	0.048353	17.5159

## Sheet: OQMD GS
formula	energy	dH	volume_pa
Ti1W1O3	-8.5053	-1.65967	11.9534
Zr2Ti1W1	-9.32324	0.114914	19.4161
Ti1W3	-11.7301	-0.0853994	15.963
Zr1Ti3	-7.92927	-0.0189314	18.7022
Ta2Ti1	-9.12872	1.33899	20.8704
Zr2Ta1	-9.53439	0.114571	21.3562
Mo1	-10.8481	0	15.8
Ti3Mo2	-8.78473	0.173339	15.9336
Zr5W1	-9.08512	0.197558	21.693
Ta1Ti1W2	-11.3993	-0.031569	16.4769
Ta2O1	-9.10255	0.306902	17.4432
Zr2W1	-9.87176	0.146424	20.2882
Ta4O5	-9.32499	-1.54425	11.6345
Zr2Mo2O5	-8.79607	-1.97307	12.2534
Ta1Ti2Mo1	-9.50602	0.0181604	16.5166
Zr1	-8.54717	0	23.4462
Ta1Ti1O4	-9.14811	-2.87415	13.7286
Ti6O11	-8.85286	-3.20906	11.3675
Ti4O7	-8.86679	-3.18903	10.5416
Ti4O11	-7.81103	-2.44113	11.4154
Ti1Mo1W1	-9.84552	0.656595	18.779
Ta1Ti2O4	-8.94437	-2.46697	11.5269
Ti7O13	-8.84126	-3.2068	10.5235
Zr1Ta2Mo1	-10.7132	0.0618922	18.3612
Zr1Ti2O1	-8.3138	-1.19715	15.3607
Zr5Mo1	-8.77061	0.160047	21.6858
W3O2	-9.88461	-0.299163	13.1524
Mo1O2	-8.78635	-2.15479	11.0649
Zr3Ti1	-8.31968	0.015218	21.7826
Mo4O5	-8.14704	-0.812731	11.647
Ti4O5	-8.8772	-2.9429	10.0292
Zr1Ta1	-10.1049	0.0949582	20.6325
Zr2Ti2O5	-8.71411	-2.59111	12.1057
Ta1W1	-12.5079	-0.101577	17.0047
Ti2W2O5	-8.85051	-1.74684	10.9141
Zr1Ti1O3	-8.49775	-2.53473	11.3254
Zr1Ta1O3	-8.93398	-2.14007	12.6832
Ti2O1	-8.62618	-1.98637	12.0255
Zr1Ti1Mo1	-8.58898	0.442125	20.8053
Ti1O1	-8.85344	-2.74276	10.6658
Ta1Ti3	-8.70109	0.03559	17.4548
Ta3Mo1	-11.6696	-0.0681909	17.438
Zr2O1	-8.88695	-1.68107	19.0891
W3O8	-9.16572	-2.34145	11.5281
Zr1Mo1W1	-10.1039	0.681219	20.6492
Ta1O2	-9.84588	-2.8795	11.7688
Ti2W3	-10.386	0.469367	15.2965
Ti1W1	-10.3994	-0.0703075	16.0911
Ta2Mo2O5	-8.7865	-1.22898	11.3863
Zr1Ti5	-7.86556	-0.025982	18.1504
Ta1W3	-12.7732	-0.0898841	16.4662
Zr4Ta3	-9.85632	0.107429	20.8112
Ta2Mo1W2	-10.9523	1.14243	18.575
Zr1Ta2Ti1	-9.82256	0.165014	18.8188
W3O1	-10.2325	0.618476	14.6719
Zr1Mo2O8	-8.65567	-2.61661	17.8624
Ti5O9	-8.85639	-3.19925	10.5429
Mo1W1	-11.9141	-0.00996441	15.9588
Ti1Mo1	-9.40686	-0.133789	16.1095
Ti1Mo1O3	-8.10133	-1.67812	11.5004
Ta1Mo1W2	-12.2288	-0.07357	16.3901
Ta2Mo2O11	-9.00916	-2.66533	15.2418
Ta1Mo2W1	-11.7662	-0.138964	16.3488
Zr1Ta1W1	-10.5091	0.61086	21.7619
Ti5W1	-8.52912	0.0459634	16.8238
Ti2W1	-9.48366	-0.0315502	16.4669
Zr2W1O4	-8.94681	-2.06856	13.246
Zr5Ta1	-9.00207	0.0959937	22.3703
W1O3	-9.07829	-2.44577	13.9314
Ti4Mo3	-8.96764	0.0804278	16.6404
Ta2O5	-9.7476	-3.13023	11.8906
Mo1W1O3	-8.49446	-1.01883	12.2613
Zr1Ti1	-8.12445	-0.00183944	20.26
Ti3W1	-9.02446	-0.0108694	16.4182
Zr1Mo2	-10.2188	-0.137657	18.3976
Zr1Mo1O3	-8.2948	-1.70177	13.9772
Ta1Ti1Mo1	-9.60846	0.524426	19.5508
Ti1Mo3	-10.2199	-0.159297	15.7146
Ti5O12	-7.92993	-2.47288	12.1006
Zr2Ti1	-8.25475	0.00938337	21.2233
Ta1	-11.8525	0	18.23
Zr1Ti1W2	-10.3601	0.18134	17.3455
O1	-4.84446	0	9.60146
Zr2Ta1W1	-10.2451	0.231658	19.5449
Ta3O1	-9.72116	0.29906	15.9765
Mo1O3	-8.26747	-2.16298	12.7826
Ta1Ti1W1	-10.2184	0.6185	19.8197
Zr1W1O3	-8.65256	-1.63711	12.2
Ta1Ti1	-9.76742	0.00787273	17.5808
Zr3Ta1	-9.27142	0.102093	21.7233
Ti3O1	-8.45426	-1.54989	13.4334
Ta1Mo1W1	-11.0791	0.807806	19.7516
Zr2Ti1O4	-9.00336	-2.87685	12.7312
Mo1W3	-12.4358	-0.00360742	16.0432
Ti6O1	-8.17752	-0.932997	15.0974
Zr1Ta1Mo2	-10.5695	-0.0455475	17.613
Ti2Mo1W1	-9.81095	-0.00985299	15.8267
Ta3Ti4	-9.44698	0.0315657	17.5166
Zr3O1	-9.01997	-1.47876	18.0219
Zr4O5	-8.60094	-2.28925	13.1667
Ti1	-7.77564	0	16.7921
Zr2O7	-7.36571	-1.94822	13.9282
Ti5Mo1	-8.20317	0.0198941	16.7506
Ta1Ti2W2	-10.0144	0.619433	17.7704
Zr2Mo1W1	-10.0607	0.164947	18.7405
Zr2Ta1O4	-9.15756	-2.43755	13.3513
Zr4Mo3	-9.46337	0.069903	19.4116
Zr1Ta3	-10.9134	0.112742	19.1506
Ta1Mo2W2	-10.9686	0.925207	18.7511
Ta2Ti3	-8.94308	0.416762	17.1084
Mo3O1	-8.87598	0.390908	14.161
Ta1O1	-9.68978	-1.50187	11.1153
Ti1Mo2	-8.53332	1.26475	18.9412
Ta1Mo3	-11.2165	-0.117279	16.1914
Mo3W1	-11.3778	-0.00164983	15.7937
Ta2Mo1O4	-9.11821	-1.59731	12.5163
Ti2O5	-8.07333	-2.64296	10.865
Mo4O11	-8.23526	-2.02535	13.7484
Zr3Ti4	-8.0637	-0.00173555	19.8086
Zr2O5	-8.40959	-2.73661	14.3247
Ta2Ti2O5	-9.11175	-2.25423	11.1754
Ta1O3	-7.962	-1.60639	8.36298
Ta1Ti1Mo2	-10.4502	-0.138519	16.2572
Ta3O2	-10.1482	-1.22733	12.7202
Ta2W2O5	-9.1589	-1.13202	10.9818
Ti2O3	-8.91509	-3.12189	10.3728
Ti2Mo2O5	-8.28604	-1.65173	11.2514
Zr3W1	-9.51267	0.137758	20.8099
Zr3O2	-9.16526	-2.22764	14.4911
Zr3Ti2	-7.99884	0.208687	21.0388
Ta2Mo1W1	-12.0232	-0.144834	16.8548
Ti2Mo1O4	-8.60099	-2.26708	11.4415
Ti1O3	-7.4264	-2.10941	10.7659
Ti1Mo1W2	-11.1872	-0.0705608	15.8064
Mo2W2O5	-8.64734	-0.843664	10.6332
Zr1W2	-11.6336	-0.144438	18.7064
Ti3O5	-8.88739	-3.17356	10.8006
Ta1Ti2W1	-9.98712	0.0650912	16.6076
Zr2Ti1Mo2	-8.67282	0.624895	20.1436
Zr1Ta1W2	-11.4914	0.088623	17.8213
W1O2	-9.51237	-2.17678	11.1718
Ta1Mo1	-11.5447	-0.19436	16.8113
Ta1Ti1O3	-8.80937	-2.18528	12.4398
Mo1O1	-8.61155	-0.925856	10.5447
Ti1O2	-8.82419	-3.24264	11.46
Ta1Ti5	-8.3882	0.00226565	17.351
Zr2Mo1O4	-8.81836	-2.24184	13.4624
Zr2Ti1Mo1	-8.86734	0.0427842	19.3443
Ti3O2	-8.70497	-2.27682	11.1352
Mo1W2O4	-8.78697	-0.949587	12.047
Zr1W1	-10.6599	0.0938115	19.1786
W1O1	-9.30424	-0.562491	10.9066
Ta1Ti2	-9.06198	0.0209012	17.5416
Zr1Ta1Ti1	-8.57295	0.792972	22.0432
Ta3W1	-12.1717	-0.0422664	17.5106
Zr1W3	-11.7739	0.0830291	17.1681
Ta2Ti1Mo1	-10.6302	-0.0673809	17.0277
Zr1Ti2Mo1	-8.66353	0.0343142	17.4978
Ta4O1	-11.0502	-0.663524	15.5975
Zr4Ti3	-8.17563	0.00763767	20.7203
Ti3Mo1	-8.57676	-0.0912	16.3369
Zr1Mo1W2	-11.2275	0.10139	17.096
Mo2O1	-9.01786	-0.27804	12.9365
Zr4O11	-8.28129	-2.68496	12.8482
Mo2O5	-8.24701	-1.91663	14.979
Ti4W3	-9.82135	0.131915	16.8618
Zr2Ta2O5	-9.19275	-2.14654	12.0982
Ta3Ti1	-10.7834	0.0304673	17.8669
Zr1Mo3	-10.272	0.000812008	16.9332
Ti1Mo2W1	-10.7422	-0.15359	15.769
Zr2Mo1	-9.29551	0.0186348	20.3394
Zr1Ta1Ti2	-8.86318	0.0857727	18.4959
Zr2W2O5	-9.15073	-1.85837	12.1399
Zr2O3	-9.2381	-3.10525	13.0292
W2O3	-9.6402	-1.74214	10.7009
Ti1W2O4	-8.98594	-1.59856	11.5326
Ta1W2O4	-9.10999	-1.12911	12.1422
Ta1W1O3	-8.76879	-1.09227	12.7734
W1	-12.9602	0	16.14
W11O12	-9.68283	-1.12449	13.1053
Zr1O2	-9.49757	-3.63298	11.9658
Ta2O3	-8.85844	-1.40345	12.6732
Zr1Ti2	-7.9918	-0.0107006	19.1907
Ta1Mo1O3	-8.83638	-1.58228	12.7651
Ti2Mo1	-8.85682	-0.108755	16.3272
Zr1Ta2W1	-11.222	0.08107	18.3987
Zr1Ti1Mo2	-9.46049	0.0248621	17.1434
Zr2Ta1Mo1	-9.79056	0.158176	19.4344
Zr1O1	-9.05833	-2.52309	12.4253
Zr2Ta1Ti1	-9.03933	0.121903	20.1823
Ti1O4	-6.62111	-1.46286	11.1254
Zr3Mo1	-9.06993	0.0524733	20.7377
Zr1Ti2W1	-9.14253	0.0833444	17.5795
Zr4W3	-10.2851	0.153353	19.4675
Zr1Ta1Mo1	-9.89838	0.517553	21.5187
Ta2Ti1W1	-11.1334	-0.0425658	17.1403
Zr1Mo2W1	-10.819	-0.0181371	16.9816
Zr1Mo1	-9.68909	0.00853464	19.0041
Zr1Ti1W1	-9.15255	0.582594	21.0327
W4O5	-9.12701	-0.853973	10.4829
Zr1O3	-8.01639	-2.48713	11.7776
Mo2O3	-8.95094	-1.89773	10.6033
