# Supplementary material for: High throughput exploration of the oxidation landscape in high entropy alloys
Source: Royal Society of Chemistry journal article supplement (doi:10.1039/d2mh00729k), 2022-01-01
Supplement: d2mh00729k5.zip [file d2mh00729k5.zip]

## Sheet: AUC2_OXIDE_PHASES
	Mo1O2	Ta2O5	Ti1O1	Ti1O2	Ti2O1	Ti2O3	Ti3O1	Ti3O5	Ti6O1	Ti6O11	W1O3	Zr1O2	Zr3O1	Ta2Mo2O11	Zr1Mo2O8	Self
Mo10Ta10Ti10W10Zr10	1126.22	12762.3	6509.27	21775.7	4113.37	7122.19	178.046	2221.41	38.6316	279.404	9513.41	57018.5	260.369	2136.42	0	3458.26
Mo10Ta10Ti10W15Zr5	684.284	15489.2	3882.45	28126.9	2323.51	8241.26	147.119	3047.58	33.7112	421.396	16794.9	31892.1	0	2604.35	0	3275.04
Mo10Ta10Ti10W5Zr15	1678.33	10374	8212.63	15859.9	5904.59	5695.2	374.055	1794.51	42.1298	201.963	3876.08	77114.9	1146.64	1750.25	0	3872.37
Mo10Ta10Ti15W10Zr5	1126.22	13965.6	8056.53	33059.2	3618.57	14879.5	297.043	4155.95	84.059	631.196	9513.41	30965.8	0	2136.42	0	3592.04
Mo10Ta10Ti15W5Zr10	1678.33	11527.8	10731.2	24160.6	6024.53	12746.6	560.531	3317.83	84.575	476.352	3876.08	55029.2	506.928	1750.25	0	3728.19
Mo10Ta10Ti5W10Zr15	1126.22	11811.2	3642.38	10769.5	2937.49	2289.3	128.654	900.427	13.0029	85.2389	9513.41	80495.8	726.638	2136.42	0	3708.84
Mo10Ta10Ti5W15Zr10	684.284	14301.8	2346.76	13925.9	1997.49	3158.85	67.8713	1037.54	9.91979	137.134	16794.9	59068.2	61.3786	2604.35	0	3159.3
Mo10Ta15Ti10W10Zr5	949.607	25384	3239.62	22175.7	1843.63	11996.8	154.054	3279.63	34.7462	309.211	9225.3	31996.3	83.8241	2014.21	0	2974.89
Mo10Ta15Ti10W5Zr10	1477.26	20201.3	5601.48	15779.6	3353.54	10734.2	315.117	2312.49	38.2445	220.909	3686.12	56182	721.389	1551.18	0	3118.05
Mo10Ta15Ti15W5Zr5	1477.26	22588.6	6086.6	24075.4	3491.43	20233.8	361.048	4266.37	78.1667	528.167	3686.12	30558.2	276.063	1551.18	0	3136.78
Mo10Ta15Ti5W10Zr10	949.607	22862.3	1971.58	10958.8	1641.99	5022.06	111.218	1161.7	11.2128	93.1823	9225.3	58897.5	539.182	2014.21	0	2812.15
Mo10Ta15Ti5W15Zr5	540.322	29518.2	1173.42	14387.6	736.878	5063.05	30.0586	1418.95	8.09377	343.112	16566.1	33022.2	41.1164	2561.31	0	3114.8
Mo10Ta15Ti5W5Zr15	1477.26	18298.1	3258.79	7766.83	2530.57	4039.48	154.941	948.851	13.9499	60.6728	3686.12	78707.5	1419.96	1551.18	0	3380.86
Mo10Ta5Ti10W10Zr15	1319.25	4599.38	8535.03	21092.7	6245.47	2461.62	322.968	1122.31	42.6512	254.904	11037.9	74537.7	690.144	1435.95	8.54678	3953
Mo10Ta5Ti10W15Zr10	839.613	5727.6	6305.16	26829.8	3838.35	3888.56	117.485	886.783	39.637	378.408	18710.2	52660.8	46.919	1505.2	0	3317.13
Mo10Ta5Ti15W10Zr10	1319.25	4931.61	11367.4	32001.3	6725.54	7460.7	372.911	2180.1	90.881	567.847	11037.9	53126.9	78.239	1435.95	8.54678	4075.12
Mo10Ta5Ti15W15Zr5	839.613	6052.71	9488.72	40662.6	2556.62	9009.23	412.897	1857.99	65.6616	827.529	18710.2	27949.8	0	1505.2	0	3452.32
Mo10Ta5Ti15W5Zr15	1942.74	3900.57	14934.8	23961.9	10459.2	4656.54	660.732	2517.52	90.6835	433.93	4757.7	74925.6	1104.11	1401.99	91.1017	4378.06
Mo10Ta5Ti5W15Zr15	839.613	5472.89	3477.23	13289.4	2381.67	883.319	93.0025	308.449	11.8997	125	18710.2	74962.8	368.694	1505.2	0	3500.46
Mo15Ta10Ti10W10Zr5	3070.58	15500.1	4496.35	27371.2	1939	8640.4	145.154	3122.44	25.3449	436.079	13532.1	31986.5	0	3381.67	0	3451.71
Mo15Ta10Ti10W5Zr10	3932.31	11880.4	5507.91	20679.8	4048.46	8165.19	178.046	2370.66	38.3075	223.895	5563.87	57636.3	184.212	3181.81	0	3701.02
Mo15Ta10Ti15W5Zr5	3932.31	13272.3	6709.98	31446.1	3798.53	16210	234.381	4616.75	50.2692	541.82	5563.87	31148.2	0	3181.81	0	3799.41
Mo15Ta10Ti5W10Zr10	3070.58	13812.4	2771.76	13550.8	1764.35	3298.58	46.6201	1192.57	9.88157	95.6279	13532.1	59665.1	48.1366	3381.67	0	3350.86
Mo15Ta10Ti5W15Zr5	2311.22	17349.4	1453.75	17194.7	935.756	2894.02	28.0428	1405.59	1.58319	305.116	23441.5	31967.5	0	3678.82	0	3054.53
Mo15Ta10Ti5W5Zr15	3932.31	10787.5	3220.22	10211.8	2977.36	2715.65	128.654	969.31	12.9787	60.501	5563.87	80287.4	945.913	3181.81	0	3727.23
Mo15Ta15Ti10W5Zr5	3721.07	24964	3239.62	21048.6	1832.47	12548.5	154.054	3030.91	34.7462	402.101	5011.03	31899	55.9211	3234.06	0	3162.72
Mo15Ta15Ti5W10Zr5	2861.02	28839.4	1173.42	14155.1	727.741	5262.77	25.0516	1299.95	8.09377	409.507	12403.8	33244.1	0	4023.76	0	3098.96
Mo15Ta15Ti5W5Zr10	3721.07	21673.8	1971.58	10383.5	1626.89	5254.28	104.15	1228.27	11.2128	66.0453	5011.03	58769.4	399.631	3234.06	0	2803.69
Mo15Ta5Ti10W10Zr10	3549.07	5338.72	6327.72	26166.1	3237.92	4625.32	143.223	1228.39	39.637	286.331	15108.2	52821.9	0	2142.88	267.424	3509.15
Mo15Ta5Ti10W15Zr5	2609.75	6557	4839.22	32315.8	865.745	4859.17	70.6683	1263.04	10.6537	467.656	25317.9	27933.1	0	2180.96	91.1017	3020.66
Mo15Ta5Ti10W5Zr15	4642.68	4055.97	8438.2	20173.8	5703.86	3187.65	225.837	1397.24	42.6512	204.188	6515.73	74287.8	396.748	2131.96	545.835	4215.71
Mo15Ta5Ti15W10Zr5	3549.07	5765.14	8472.12	39660.3	2684.48	10134.3	262.011	2424.44	33.524	651.32	15108.2	28057.9	0	2142.88	267.424	3669.95
Mo15Ta5Ti15W5Zr10	4642.68	4503.34	12422.1	30647.8	5887.15	7750.04	372.911	2639.07	90.7219	486.436	6515.73	52076.8	78.239	2131.96	545.835	4001.08
Mo15Ta5Ti5W10Zr15	3549.07	5005.24	3438.94	12960	1954.96	1247.59	93.0025	464.815	11.8997	87.2363	15108.2	75453.7	368.694	2142.88	267.424	3571.21
Mo15Ta5Ti5W15Zr10	2609.75	6262.03	2116.43	16027.2	823.216	1920	34.009	346.859	4.33896	125.397	25317.9	53441.2	0	2180.96	91.1017	3016.65
Mo5Ta10Ti10W10Zr15	156.658	11067.3	7234.4	16535.5	6575.13	4980.51	372.54	1662.67	42.1298	284.361	6644.01	76200.7	1378.79	788.125	0	3518.19
Mo5Ta10Ti10W15Zr10	32.0729	13711.7	6686.03	22536.7	4557.16	6305.38	292.553	1944.01	38.6316	413.508	12158.2	57251.5	507.926	1039.41	0	3369.35
Mo5Ta10Ti15W10Zr10	156.658	12133.4	11078.4	25183.7	6847.77	11012.4	584.865	3119.04	84.575	628.473	6644.01	54854.7	656.394	788.125	0	3606.54
Mo5Ta10Ti15W15Zr5	32.0729	14939.9	8467.35	34251.1	4280.89	13653.5	297.043	3744.93	84.059	903.946	12158.2	31226.9	41.1164	1039.41	0	3482.29
Mo5Ta10Ti15W5Zr15	399.145	9637.71	5615.59	17034.4	9710.35	8956.5	771.143	2484.51	86.4071	426.414	2639.34	72856.5	1642.75	606.442	0	3071.82
Mo5Ta10Ti5W15Zr15	32.0729	12766.4	799.326	11135.6	3284.28	2029.22	151.871	763.713	13.0029	137.293	12158.2	80036.7	1177.53	1039.41	0	3193.54
Mo5Ta15Ti10W10Zr10	84.3937	20715.5	4886.66	16579.5	3773.45	10206.4	315.117	2184.02	38.2445	312.074	6147.12	56212.8	721.389	740.189	0	3112.45
Mo5Ta15Ti10W15Zr5	7.77817	25888.1	3416.38	23052.8	2206.39	11345.2	133.549	2915.42	34.7462	461.272	11591.3	31915.7	159.98	1033.15	0	2605.54
Mo5Ta15Ti10W5Zr15	279.646	16221	5872.74	10781.4	6526.33	8398.89	420.33	1765.23	46.4736	198.785	2339.75	76399	1701.84	508.175	0	3299.01
Mo5Ta15Ti15W10Zr5	84.3937	23013.2	7247.49	25286.5	3276.09	18641.4	514.335	4077.97	78.1667	700.27	6147.12	30443.1	243.548	740.189	0	3004.03
Mo5Ta15Ti15W5Zr10	279.646	18150.5	10330.1	16530.7	6851.5	16314.7	660.732	3241.5	91.674	466.968	2339.75	55231	884.838	508.175	0	3453.06
Mo5Ta15Ti5W10Zr15	84.3937	18898.8	690.8	8165.04	2774.01	3696.76	161.291	886.095	13.9499	97.3853	6147.12	78040.5	1419.96	740.189	0	2890.27
Mo5Ta15Ti5W15Zr10	7.77817	23712.8	2014.44	11380	1838.68	4524.1	107.086	1107.35	11.2128	150.647	11591.3	58984.2	539.182	1033.15	0	2755.94
Mo5Ta5Ti10W15Zr15	74.8729	4917.46	4960.04	22084.1	6772.01	1917.99	302.463	830.176	42.9753	374.795	12698.3	75002.7	506.495	1051.17	0	3422.01
Mo5Ta5Ti15W10Zr15	249.031	4246.06	6404.35	25111.4	11437.1	3878.08	615.429	2063.43	91.674	570.143	7119.36	74640.5	884.838	847.018	0	3406.3
Mo5Ta5Ti15W15Zr10	74.8729	5208.61	11714.6	33529.8	7398.72	6234.81	481.4	1731.08	92.6264	804.51	12698.3	53233.2	98.8084	1051.17	0	3720.23
	Mo1	Ta1	Ti1	W1	Zr1	Mo1W1	Mo1W3	Mo3W1	Ta1Mo1	Ta1Mo3	Ta1W1	Ta1W3	Ta3W1	Ti1Mo1	Ti1Mo3	Ti2Mo1	Ti3Mo1	Zr1Mo2	Zr1Ti5	Zr1W2	Ta1Mo2W1	Ti1Mo2W1	Self
Mo10Ta10Ti10W10Zr10	10810	0	91.0992	5946.88	283.393	5736.9	33.3107	3010.56	9000.25	0	5889.97	5325.36	0	0	0	0	0	0	12.2172	1919.66	10001.8	0	3458.26
Mo10Ta10Ti10W15Zr5	11313.6	0	10.4523	11821.7	0	11723.7	1018.13	3373.36	3788.44	0	2690.48	12090.7	0	0	0	8.22017	27.9284	0	0	899.405	10826.2	18.7645	3275.04
Mo10Ta10Ti10W5Zr15	9690.74	313.464	77.0349	2183.57	1059.56	676.133	0	2432.21	18744.2	0	3372.69	1798.55	0	0	0	0	0	0	9.82495	1428.47	6890.95	0	3872.37
Mo10Ta10Ti15W10Zr5	11608.7	0	73.4579	5946.88	0	6739.26	37.0241	3233.9	7813.82	0	6426.16	6218.56	0	0	0	0	28.9471	0	14.4735	1018.13	11334.1	0	3592.04
Mo10Ta10Ti15W5Zr10	10415.5	325.154	180.332	2183.57	774.104	900.863	0	2801.46	18477.1	0	3555.97	2024.13	0	0	0	0	0	0	27.0109	1148.99	7561.74	0	3728.19
Mo10Ta10Ti5W10Zr15	10123.5	0	36.3704	5946.88	566.643	4928.32	30.2761	2840.65	9709.55	0	5728.74	4613.92	0	0	0	0	0	0	2.51718	2528.41	9234.73	0	3708.84
Mo10Ta10Ti5W15Zr10	10481.1	0	26.4932	11780.9	97.2727	10725.8	820.933	3144.54	5258	0	2867.67	10194.3	0	0	0	0	0	0	3.13836	2299.39	9519.87	0	3159.3
Mo10Ta15Ti10W10Zr5	11118.6	0	30.8703	6168.61	118.968	6236.08	37.0241	3260.56	17690.9	0	11029.6	6957.11	0	0	0	0	0	0	12.2172	397.556	7855.29	0	2974.89
Mo10Ta15Ti10W5Zr10	9686.3	598.114	77.0349	2199.16	764.434	736.576	0	2633.28	26709.1	0	11895.6	1218.31	0	0	0	0	0	0	9.82495	0	4754.48	0	3118.05
Mo10Ta15Ti15W5Zr5	10430.6	623.154	61.2893	2199.16	362.979	991.316	0	3057.89	27430	0	12099.8	1422.76	0	0	0	0	0	0	27.0109	0	5473.77	0	3136.78
Mo10Ta15Ti5W10Zr10	10267.8	218.84	21.887	6168.61	403.751	5330.41	33.3107	3058.94	17806.2	0	11470.5	6023.7	0	0	0	0	0	0	2.51718	554.751	6941.77	0	2812.15
Mo10Ta15Ti5W15Zr5	12464.3	0	8.97353	12366.5	0	11657.1	899.2	3398.3	10475.6	0	4840.33	13482.1	0	0	0	0	2.76809	0	1.38404	492.368	7960.89	0	3114.8
Mo10Ta15Ti5W5Zr15	9084.51	577.206	30.9909	2199.16	929.527	534.579	0	2298.59	26479.6	0	11912.2	1052.14	0	0	0	0	0	0	2.10128	0	4179.28	0	3380.86
Mo10Ta5Ti10W10Zr15	15770.1	0	60.2289	4148.91	653.652	5370.82	37.88	2941.91	2131.68	0	455.564	5449.28	0	0	0	43.7992	0	1043.94	0	2955.74	6982.81	869.094	3953
Mo10Ta5Ti10W15Zr10	18602.6	0	73.5709	8883.67	27.7122	10871.6	939.506	3587.98	1032.77	0	0	9766.13	0	0	0	55.4244	0	488.671	0	2694.26	2741.62	1717.93	3317.13
Mo10Ta5Ti15W10Zr10	16582.1	0	0	4148.91	273.261	6302.26	46.6415	3360.49	1467.54	0	506.314	6253.92	0	0	0	77.4664	26.153	681.96	0	1988.66	7194.12	885.012	4075.12
Mo10Ta5Ti15W15Zr5	19805.8	0	0	8927.9	0	12063.1	1172.03	4059.51	286.338	0	0	11119.8	0	0	0	113.287	3.70713	0	0	1209.56	2637.45	1785.53	3452.32
Mo10Ta5Ti15W5Zr15	10826.1	0	119.043	1365.43	1190.35	825.806	0	2583.69	2638.68	0	1024.58	536.251	0	0	0	61.9399	20.9765	1277.88	0	1319.34	12567.6	0	4378.06
Mo10Ta5Ti5W15Zr15	18086.7	0	35.0393	8847.09	256.508	9922.1	754.009	2957.86	1572.73	0	0	8492.85	0	0	0	12.0656	0	780.332	0	4156.46	3065.63	1705.82	3500.46
Mo15Ta10Ti10W10Zr5	22446.8	0	0	6301.16	0	4676.96	10.4087	7063.31	3797.43	0	1869.1	4204.84	0	25.4658	0	33.7544	0	138.583	0	746.743	18108.8	53.0246	3451.71
Mo15Ta10Ti10W5Zr10	20696.9	255.417	60.2289	2393.25	314.358	0	0	4437.71	13219.8	1028.58	1052.62	370.805	0	0	0	43.7992	0	728.46	0	750.36	13930.5	0	3701.02
Mo15Ta10Ti15W5Zr5	21942.3	276.15	0	2393.25	31.0858	0	0	5309.01	12950.5	1195.37	1119.81	466.475	0	0	0	46.4798	15.6918	464.644	0	495.73	15362.8	0	3799.41
Mo15Ta10Ti5W10Zr10	21138.5	0	17.5197	6301.16	84.6029	3894.21	9.25223	6445.99	4699.13	0	3139.99	3150.2	0	0	0	12.0656	0	494.549	0	1292.83	16304	0	3350.86
Mo15Ta10Ti5W15Zr5	24642.2	0	0	11876.9	0	12739.2	94.1104	7671.34	603.705	0	0	9018.65	0	0	0	3.66146	0	0	0	534.099	13324.4	45.1837	3054.53
Mo15Ta10Ti5W5Zr15	19714.8	248.682	28.9668	2393.25	573.114	0	0	3762.13	13932.4	896.868	1007.45	292.378	0	0	0	9.82737	0	1050.61	0	1055.52	12886.6	0	3727.23
Mo15Ta15Ti10W5Zr5	22215.9	0	30.8703	2944.92	118.968	0	0	4871.18	24898.7	1150.44	2538.66	1688.94	0	0	0	0	0	0	12.2172	461.097	11304.3	0	3162.72
Mo15Ta15Ti5W10Zr5	23288.3	0	26.4932	8027.7	0	4277.9	10.4087	7051.75	13000.8	0	2377.66	5965.02	0	0	0	0	2.76809	0	1.38404	586.385	14425.8	0	3098.96
Mo15Ta15Ti5W5Zr10	19976	467.585	21.887	2944.92	359.293	0	0	4094.32	26403.6	991.041	2847.57	1305.91	0	0	0	0	0	0	2.51718	895.261	10006.6	0	2803.69
Mo15Ta5Ti10W10Zr10	28571.2	0	0	4068.02	27.7122	4358.65	3.14135	6881.86	902.042	0	387.537	4319.48	0	0	0	55.4244	0	1431.48	0	1571.06	7487.56	1717.82	3509.15
Mo15Ta5Ti10W15Zr5	30312.6	0	0	8334.41	0	13228.3	82.2145	8529.33	184.163	0	0	8150.89	0	0	0	20.4376	0	37.1051	0	609.255	2859.57	1824.34	3020.66
Mo15Ta5Ti10W5Zr15	25512.4	0	60.2289	1351.17	515.069	0	0	4214.39	1942.25	814.885	898.074	344.807	0	0	193.695	43.7992	0	2749.86	0	971.125	10377.5	419.835	4215.71
Mo15Ta5Ti15W10Zr5	30155.7	0	0	4068.02	0	5337.67	3.14135	8024.64	336.411	0	400.409	4982.31	0	89.547	0	15.6918	0	304.43	0	609.924	7704.48	1659.71	3669.95
Mo15Ta5Ti15W5Zr10	27065.8	0	0	1351.17	276.317	0	0	5064.22	1464.56	869.139	928.981	430.504	0	0	276.657	112.708	0	1929.32	0	732.282	10933.8	347.611	4001.08
Mo15Ta5Ti5W10Zr15	27646.3	0	35.0393	4068.02	256.508	3568.86	3.14135	5967.18	1572.73	0	376.844	3886.87	0	0	0	12.0656	0	2146.52	0	2252.5	7028.22	2029.48	3571.21
Mo15Ta5Ti5W15Zr10	29115.6	0	9.71763	8334.41	0	11581.2	63.9628	7536.87	321.224	0	0	7231.36	0	11.2161	0	3.22343	0	636.768	0	1630.16	3461.06	2321.1	3016.65
Mo5Ta10Ti10W10Zr15	3800.11	0	574.098	4719.23	2111.68	3598.65	797.13	770.284	8654.32	0	13532.6	6225.93	0	0	0	0	0	0	9.82495	894.859	3445.25	0	3518.19
Mo5Ta10Ti10W15Zr10	3935.05	0	91.0992	10258	489.711	4832.73	2983.17	863.398	7283.84	0	6726.31	13747.5	0	0	0	0	0	0	12.2172	1245.31	3262.69	0	3369.35
Mo5Ta10Ti15W10Zr10	4246.55	0	180.332	4758.56	852.322	3940.47	984.221	835.656	8608.39	0	13497.4	6904.74	0	0	0	0	0	0	27.0109	755.329	3604.88	0	3606.54
Mo5Ta10Ti15W15Zr5	4371.35	0	73.4579	10364.1	0	5103.65	3516.49	949.337	6910.85	0	6921.07	15091.4	0	0	0	0	28.9471	0	14.4735	926.614	3700.55	0	3482.29
Mo5Ta10Ti15W5Zr15	3195.31	355.4	7552.3	1433.64	2682.19	1852.75	6.93988	720.145	15193.6	0	14947	1270.53	0	0	0	0	0	0	21.7754	0	1404.25	0	3071.82
Mo5Ta10Ti5W15Zr15	3560.4	0	2699.08	10171.8	1642.78	4624.58	2572.79	798.419	7400.35	0	7023.89	12679.6	0	0	0	0	0	0	2.51718	1551.8	3128.94	0	3193.54
Mo5Ta15Ti10W10Zr10	3414.74	290.694	77.0349	4910.49	764.434	3875.59	864.27	814.089	13368.1	0	25806.4	4327.26	0	0	0	0	0	0	9.82495	0	2022.95	0	3112.45
Mo5Ta15Ti10W15Zr5	4110.56	0	91.0992	10769.3	118.647	5225.48	3270.84	883.622	7797.69	0	21952.2	11281.8	0	0	0	0	0	0	12.2172	397.234	3897.12	0	2605.54
Mo5Ta15Ti10W5Zr15	3024.67	4545.36	1347.26	1459.65	2379.53	1598.1	6.9399	712.83	17233.1	0	12419.3	1167.17	4578.99	0	0	0	0	0	9.82495	0	1333.67	0	3299.01
Mo5Ta15Ti15W10Zr5	3821.25	302.995	61.2893	4954.72	470.247	4269.16	1076.73	890.752	13578.5	0	26167.7	5112.71	0	0	0	0	0	0	27.0109	0	2344.16	0	3004.03
Mo5Ta15Ti15W5Zr10	3361.37	4675.89	180.332	1459.65	1132.2	2002.18	7.57047	772.192	17466.8	0	12757.4	1385.49	4476.06	0	0	0	0	0	27.0109	0	1535.93	0	3453.06
Mo5Ta15Ti5W10Zr15	3085.08	271.713	2394.71	4873.91	1735.79	3565.12	696.217	755.242	13302.1	0	25715	3704.52	0	0	0	0	0	0	2.10128	0	1766.88	0	2890.27
Mo5Ta15Ti5W15Zr10	3698.58	0	36.3704	10672.2	407.925	4978.97	2800.22	807.178	7805.4	0	21681.9	9868.74	0	0	0	0	0	0	2.51718	554.751	3502.33	0	2755.94
Mo5Ta5Ti10W15Zr15	7656.9	0	3457.24	9782.28	1472.62	4555.07	2750.77	968.17	2490.92	0	0	11639.8	0	0	0	0	0	0	12.2172	4369.67	1390.91	1070.85	3422.01
Mo5Ta5Ti15W10Zr15	3929.67	0	8398.02	4563.08	2309.6	3660.65	906.77	784.213	3055.11	0	540.96	7922.84	0	0	0	0	0	0	27.0109	3055.11	5857.17	0	3406.3
Mo5Ta5Ti15W15Zr10	8543.62	0	215.169	9875.71	247.868	4825.55	3215.97	1144.69	1870.01	0	0.989328	12850.6	0	0	0	0	0.989328	0	34.784	3405.56	1367.79	902.962	3720.23
