# Supplementary material for: 『南無阿弥陀仏作善集』の「両界堂」と東大寺大仏殿
Source: Royal Society of Chemistry journal article supplement (doi:10.1039/d2mh00729k), 1980-09-12
Supplement: d2mh00729k6.pdf [file d2mh00729k6.pdf]

## Supplementary information

### High Throughput Exploration of the Oxidation Landscape in High Entropy Alloys

D. Saucedo<sup>a</sup>, P. Singh<sup>a,b</sup>, G. Ouyang,<sup>b</sup> O. Palasyuk,<sup>b</sup> M. J. Kramer<sup>b</sup>, and R. Arroyave<sup>a, c</sup>

<sup>a</sup> Department of Materials Science & Engineering, Texas A&M University, College Station, TX, 77843, USA

<sup>b</sup> Ames Laboratory, United States Department of Energy, Iowa State University, Ames, IA 50011, USA

<sup>c</sup> Department of Mechanical Engineering, Texas A&M University, College Station, TX, 77843, USA

Generally, the Bartel model only considers the entropies due to lattice vibrational. As discussed in the Methodology: SRO theory, a main driving force of HEA stability is the configurational entropy captured with the short-range ordering contributions. Therefore, augmenting the Bartel model output, Gibbs Formation energy prediction, by summing it with the additional term Gibbs short-range ordering energy,  $G_{SRO}$ , (see Eq. 8 & Eq. 9) accounts for the energy difference.

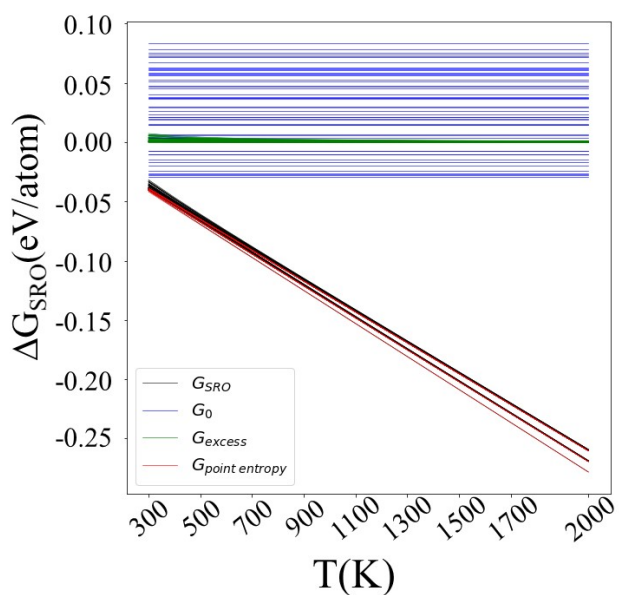

**Supplementary Figure 1.** The  $\Delta G_{form, T}$  with SRO contributions of 51 Mo-W-Ta-Ti-Zr HEAs. We found that small but finite SRO contribution stabilizes the HEA, however, the point-entropy contribution, as expected, wins over SRO at higher temperature.

Here we show the temperature dependent evolution of convex hulls for Ti and Al oxide phases. Our framework was able capture all known experimental phases of Ti-O and Al-O. All the phases are outlined in Table 3. Moreover, we found that these stable phases become pertinent in the overall oxidation analysis.

The predictions for  $Ti_xO_{1-x}$  in Fig. 2a are validated against the known experimental phases available on NIST-JANAF thermochemical tables. Our ML framework predicts  $TiO_2$ ,  $Ti_3O_5$ ,  $TiO_3$ ,  $TiO$ ,  $Ti_2O$ ,  $Ti_3O$ , and  $Ti_6O$  as seven stable phases at room temperature (300 K), while  $Ti_2O$  and  $Ti_6O$  disappear

at high temperature (1500 K) from the hull. On the other hand, only stable  $\text{Al}_x\text{O}_{1-x}$  phase in Fig. 2b, i.e.,  $\alpha$   $\text{Al}_2\text{O}_3$ , remains stable over the tested temperature range (300 K - 1500 K).

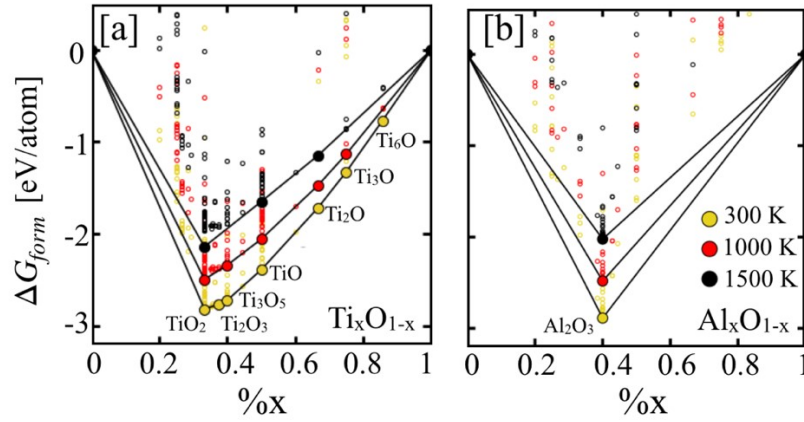

**Supplementary Figure 2.** The convex hull ( $\Delta G_{form}$ ) of (left panel)  $\text{Ti}_x\text{O}_{1-x}$ , and (right panel)  $\text{Al}_x\text{O}_{1-x}$  to provide temperature dependent phase stability of experimentally known oxide phase.

**Supplementary Table 1:** High Entropy Alloys Ground-state Database

| HEA #  | Formula<br>[.at%]        | dH<br>eV/atom | Volume<br>Ang. <sup>3</sup> /atom | Energy<br>eV/atom | HEA #  | Formula<br>[.at%]       | dH<br>eV/atom | Volume<br>Ang. <sup>3</sup> /atom | Energy<br>eV/atom |
|--------|--------------------------|---------------|-----------------------------------|-------------------|--------|-------------------------|---------------|-----------------------------------|-------------------|
| HEA 0  | Mo0.2Ta0.2Ti0.2W0.2Zr0.2 | 0.0271        | 17.667                            | -10.3938          | HEA 26 | Mo.3Ta.3Ti.1W.2<br>Zr.1 | -0.0155       | 17.106                            | -11.0624          |
| HEA 1  | Mo0.2Ta0.2Ti0.2W0.3Zr0.1 | -0.0094       | 16.962                            | -10.8714          | HEA 27 | Mo.3Ta.3Ti.1W.1<br>Zr.2 | 0.0203        | 17.798                            | -10.5856          |
| HEA 2  | Mo0.2Ta0.2Ti0.2W0.1Zr0.3 | 0.0575        | 18.466                            | -9.9224           | HEA 28 | Mo.3Ta.1Ti.2W.2<br>Zr.2 | 0.0234        | 17.348                            | -10.2963          |
| HEA 3  | Mo0.2Ta0.2Ti0.3W0.2Zr0.1 | -0.0064       | 17.121                            | -10.3622          | HEA 29 | Mo.3Ta.1Ti.2W.3<br>Zr.1 | -0.0266       | 16.713                            | -10.7873          |
| HEA 4  | Mo0.2Ta0.2Ti0.3W0.1Zr0.2 | 0.0379        | 17.882                            | -9.8768           | HEA 30 | Mo.3Ta.1Ti.2W.1<br>Zr.3 | 0.0403        | 18.096                            | -9.8383           |
| HEA 5  | Mo0.2Ta0.2Ti0.1W0.2Zr0.3 | 0.0617        | 18.258                            | -10.4244          | HEA 31 | Mo.3Ta.1Ti.3W.2<br>Zr.1 | -0.0267       | 16.857                            | -10.2812          |
| HEA 6  | Mo0.2Ta0.2Ti0.1W0.3Zr0.2 | 0.031         | 17.488                            | -10.8962          | HEA 32 | Mo.3Ta.1Ti.3W.1<br>Zr.2 | 0.0153        | 17.545                            | -9.7982           |
| HEA 7  | Mo0.2Ta0.3Ti0.2W0.2Zr0.1 | -0.0062       | 17.261                            | -10.7581          | HEA 33 | Mo.3Ta.1Ti.1W.2<br>Zr.3 | 0.059         | 17.915                            | -10.3259          |
| HEA 8  | Mo0.2Ta0.3Ti0.2W0.1Zr0.2 | 0.0386        | 17.973                            | -10.2723          | HEA 34 | Mo.3Ta.1Ti.1W.3<br>Zr.2 | 0.0216        | 17.192                            | -10.8043          |
| HEA 9  | Mo0.2Ta0.3Ti0.3W0.1Zr0.1 | 0.0075        | 17.422                            | -10.2382          | HEA 35 | Mo.1Ta.2Ti.2W.2<br>Zr.3 | 0.0683        | 18.484                            | -10.1228          |
| HEA 10 | Mo0.2Ta0.3Ti0.1W0.2Zr0.2 | 0.0305        | 17.742                            | -10.7867          | HEA 36 | Mo.1Ta.2Ti.2W.3<br>Zr.2 | 0.0487        | 17.681                            | -10.5834          |
| HEA 11 | Mo0.2Ta0.3Ti0.1W0.3Zr0.1 | -0.0226       | 17.11                             | -11.2808          | HEA 37 | Mo.1Ta.2Ti.3W.2<br>Zr.2 | 0.0592        | 17.873                            | -10.0667          |
| HEA 12 | Mo0.2Ta0.3Ti0.1W0.1Zr0.3 | 0.0574        | 18.572                            | -10.3187          | HEA 38 | Mo.1Ta.2Ti.3W.3<br>Zr.1 | 0.0051        | 17.144                            | -10.5618          |
| HEA 13 | Mo0.2Ta0.1Ti0.2W0.2Zr0.3 | 0.0624        | 18.093                            | -10.0275          | HEA 39 | Mo.1Ta.2Ti.3W.1<br>Zr.3 | 0.0845        | 18.67                             | -9.6004           |

|        |                          |         |        |          |        |                         |        |        |          |
|--------|--------------------------|---------|--------|----------|--------|-------------------------|--------|--------|----------|
| HEA 14 | Mo0.2Ta0.1Ti0.2W0.3Zr0.2 | 0.0371  | 17.354 | -10.4939 | HEA 40 | Mo.1Ta.2Ti.1W.3<br>Zr.3 | 0.0739 | 18.228 | -10.6235 |
| HEA 15 | Mo0.2Ta0.1Ti0.3W0.2Zr0.2 | 0.0219  | 17.582 | -10.0028 | HEA 41 | Mo.1Ta.3Ti.2W.2<br>Zr.2 | 0.0399 | 18.005 | -10.4822 |
| HEA 16 | Mo0.2Ta0.1Ti0.3W0.3Zr0.1 | -0.0094 | 16.813 | -10.4751 | HEA 42 | Mo.1Ta.3Ti.2W.3<br>Zr.1 | 0.0081 | 17.26  | -10.9551 |
| HEA 17 | Mo0.2Ta0.1Ti0.3W0.1Zr0.3 | 0.0633  | 18.305 | -9.5204  | HEA 43 | Mo.1Ta.3Ti.2W.1<br>Zr.3 | 0.0766 | 18.788 | -10.0045 |
| HEA 18 | Mo0.2Ta0.1Ti0.1W0.3Zr0.3 | 0.0633  | 17.918 | -10.5329 | HEA 44 | Mo.1Ta.3Ti.3W.2<br>Zr.1 | 0.0165 | 17.445 | -10.4405 |
| HEA 19 | Mo0.3Ta0.2Ti0.2W0.2Zr0.1 | -0.0195 | 16.935 | -10.6702 | HEA 45 | Mo.1Ta.3Ti.3W.1<br>Zr.2 | 0.0527 | 18.216 | -9.9632  |
| HEA 20 | Mo0.3Ta0.2Ti0.2W0.1Zr0.2 | 0.0191  | 17.668 | -10.1906 | HEA 46 | Mo.1Ta.3Ti.1W.2<br>Zr.3 | 0.0735 | 18.548 | -10.5139 |
| HEA 21 | Mo0.3Ta0.2Ti0.3W0.1Zr0.1 | -0.0294 | 17.132 | -10.1738 | HEA 47 | Mo.1Ta.3Ti.1W.3<br>Zr.2 | 0.0475 | 17.79  | -10.9809 |
| HEA 22 | Mo0.3Ta0.2Ti0.1W0.2Zr0.2 | 0.0152  | 17.499 | -10.7008 | HEA 48 | Mo.1Ta.1Ti.2W.3<br>Zr.3 | 0.0749 | 18.12  | -10.2262 |
| HEA 23 | Mo0.3Ta0.2Ti0.1W0.3Zr0.1 | -0.0269 | 16.844 | -11.1839 | HEA 49 | Mo.1Ta.1Ti.3W.2<br>Zr.3 | 0.0792 | 18.344 | -9.7157  |
| HEA 24 | Mo0.3Ta0.2Ti0.1W0.1Zr0.3 | 0.0531  | 18.249 | -10.2219 | HEA 50 | Mo.1Ta.1Ti.3W.3<br>Zr.2 | 0.0484 | 17.516 | -10.1876 |
| HEA 25 | Mo0.3Ta0.3Ti0.2W0.1Zr0.1 | -0.0136 | 17.254 | -10.5543 |        |                         |        |        |          |

**Supplementary Table 2:** The AUC<sup>2</sup> scoring metrics for each elemental dominate cluster

| Mo-Rich |                     |                  | Ta-Rich |                     |                  | Ti-Rich |                     |                  |
|---------|---------------------|------------------|---------|---------------------|------------------|---------|---------------------|------------------|
|         | Formula             | AUC <sup>2</sup> |         | Formula             | AUC <sup>2</sup> |         | Formula             | AUC <sup>2</sup> |
| HEA 30  | Mo15Ta5Ti10W5Zr15   | 4216             | HEA 0   | Mo10Ta10Ti10W10Zr10 | 3458             | HEA 17  | Mo10Ta5Ti15W5Zr15   | 4378             |
| HEA 32  | Mo15Ta5Ti15W5Zr10   | 4001             | HEA 45  | Mo5Ta15Ti15W5Zr10   | 3453             | HEA 15  | Mo10Ta5Ti15W10Zr10  | 4075             |
| HEA 21  | Mo15Ta10Ti15W5Zr5   | 3799             | HEA 12  | Mo10Ta15Ti5W5Zr15   | 3381             | HEA 32  | Mo15Ta5Ti15W5Zr10   | 4001             |
| HEA 24  | Mo15Ta10Ti5W5Zr15   | 3727             | HEA 43  | Mo5Ta15Ti10W5Zr15   | 3299             | HEA 21  | Mo15Ta10Ti15W5Zr5   | 3799             |
| HEA 20  | Mo15Ta10Ti10W5Zr10  | 3701             | HEA 25  | Mo15Ta15Ti10W5Zr5   | 3163             | HEA 4   | Mo10Ta10Ti15W5Zr10  | 3728             |
| HEA 31  | Mo15Ta5Ti15W10Zr5   | 3670             | HEA 9   | Mo10Ta15Ti15W5Zr5   | 3137             | HEA 50  | Mo5Ta5Ti15W15Zr10   | 3720             |
| HEA 33  | Mo15Ta5Ti5W10Zr15   | 3571             | HEA 8   | Mo10Ta15Ti10W5Zr10  | 3118             | HEA 31  | Mo15Ta5Ti15W10Zr5   | 3670             |
| HEA 28  | Mo15Ta5Ti10W10Zr10  | 3509             | HEA 11  | Mo10Ta15Ti5W15Zr5   | 3115             | HEA 37  | Mo5Ta10Ti15W10Zr10  | 3607             |
| HEA 0   | Mo10Ta10Ti10W10Zr10 | 3458             | HEA 41  | Mo5Ta15Ti10W10Zr10  | 3112             | HEA 3   | Mo10Ta10Ti15W10Zr5  | 3592             |
| HEA 19  | Mo15Ta10Ti10W10Zr5  | 3452             | HEA 26  | Mo15Ta15Ti5W10Zr5   | 3099             | HEA 38  | Mo5Ta10Ti15W15Zr5   | 3482             |
| HEA 22  | Mo15Ta10Ti5W10Zr10  | 3351             | HEA 44  | Mo5Ta15Ti15W10Zr5   | 3004             | HEA 0   | Mo10Ta10Ti10W10Zr10 | 3458             |
| HEA 25  | Mo15Ta15Ti10W5Zr5   | 3163             | HEA 7   | Mo10Ta15Ti10W10Zr5  | 2975             | HEA 45  | Mo5Ta15Ti15W5Zr10   | 3453             |
| HEA 26  | Mo15Ta15Ti5W10Zr5   | 3099             | HEA 46  | Mo5Ta15Ti5W10Zr15   | 2890             | HEA 16  | Mo10Ta5Ti15W15Zr5   | 3452             |
| HEA 23  | Mo15Ta10Ti5W15Zr5   | 3055             | HEA 10  | Mo10Ta15Ti5W10Zr10  | 2812             | HEA 49  | Mo5Ta5Ti15W10Zr15   | 3406             |
| HEA 29  | Mo15Ta5Ti10W15Zr5   | 3021             | HEA 27  | Mo15Ta15Ti5W5Zr10   | 2804             | HEA 9   | Mo10Ta15Ti15W5Zr5   | 3137             |
| HEA 34  | Mo15Ta5Ti5W15Zr10   | 3017             | HEA 47  | Mo5Ta15Ti5W15Zr10   | 2756             | HEA 39  | Mo5Ta10Ti15W5Zr15   | 3072             |
| HEA 27  | Mo15Ta15Ti5W5Zr10   | 2804             | HEA 42  | Mo5Ta15Ti10W15Zr5   | 2606             | HEA 44  | Mo5Ta15Ti15W10Zr5   | 3004             |
| W-Rich  |                     |                  | Zr-Rich |                     |                  |         |                     |                  |
|         | Formula             | AUC <sup>2</sup> |         | Formula             | AUC <sup>2</sup> |         |                     |                  |
| HEA 50  | Mo5Ta5Ti15W15Zr10   | 3720             | HEA 17  | Mo10Ta5Ti15W5Zr15   | 4378             |         |                     |                  |

|        |                     |      |        |                     |      |
|--------|---------------------|------|--------|---------------------|------|
| HEA 18 | Mo10Ta5Ti5W15Zr15   | 3500 | HEA 30 | Mo15Ta5Ti10W5Zr15   | 4216 |
| HEA 38 | Mo5Ta10Ti15W15Zr5   | 3482 | HEA 13 | Mo10Ta5Ti10W10Zr15  | 3953 |
| HEA 0  | Mo10Ta10Ti10W10Zr10 | 3458 | HEA 2  | Mo10Ta10Ti10W5Zr15  | 3872 |
| HEA 16 | Mo10Ta5Ti15W15Zr5   | 3452 | HEA 24 | Mo15Ta10Ti5W5Zr15   | 3727 |
| HEA 48 | Mo5Ta5Ti10W15Zr15   | 3422 | HEA 5  | Mo10Ta10Ti5W10Zr15  | 3709 |
| HEA 36 | Mo5Ta10Ti10W15Zr10  | 3369 | HEA 33 | Mo15Ta5Ti5W10Zr15   | 3571 |
| HEA 14 | Mo10Ta5Ti10W15Zr10  | 3317 | HEA 35 | Mo5Ta10Ti10W10Zr15  | 3518 |
| HEA 1  | Mo10Ta10Ti10W15Zr5  | 3275 | HEA 18 | Mo10Ta5Ti5W15Zr15   | 3500 |
| HEA 40 | Mo5Ta10Ti5W15Zr15   | 3194 | HEA 0  | Mo10Ta10Ti10W10Zr10 | 3458 |
| HEA 6  | Mo10Ta10Ti5W15Zr10  | 3159 | HEA 48 | Mo5Ta5Ti10W15Zr15   | 3422 |
| HEA 11 | Mo10Ta15Ti5W15Zr5   | 3115 | HEA 49 | Mo5Ta5Ti15W10Zr15   | 3406 |
| HEA 23 | Mo15Ta10Ti5W15Zr5   | 3055 | HEA 12 | Mo10Ta15Ti5W5Zr15   | 3381 |
| HEA 29 | Mo15Ta5Ti10W15Zr5   | 3021 | HEA 43 | Mo5Ta15Ti10W5Zr15   | 3299 |
| HEA 34 | Mo15Ta5Ti5W15Zr10   | 3017 | HEA 40 | Mo5Ta10Ti5W15Zr15   | 3194 |
| HEA 47 | Mo5Ta15Ti5W15Zr10   | 2756 | HEA 39 | Mo5Ta10Ti15W5Zr15   | 3072 |
| HEA 42 | Mo5Ta15Ti10W15Zr5   | 2606 | HEA 46 | Mo5Ta15Ti5W10Zr15   | 2890 |

## Supplementary Discussion 1: The AUC<sup>2</sup> score derivation for the HEA 0, oxide phases, and Intermetallics scores.

In this section, we demonstrate the analytics of determining the AUC<sup>2</sup> scores of the desired HEA 0 as well as the corresponding decomposing oxide and intermetallic phases that occur as a result of increasing temperature and oxygen content. Consider Figure 5, Figure 10, and Figure 13 from the main text. Recall that Figure 5 is a phase landscape view where the color hue corresponds to fractional amount of a particular phase. The objective is to show that the entirety of Figure 5 can be reviewed as a single row in Figure 15.

Therefore, we write the AUC<sup>2</sup> of a single phase as the following:

$$AUC^2 \text{ of } A = \int_0^{\max\{n_o\}} \int_{300}^{\max\{T\}} X_A(T, n_o) dn dT$$

Here,  $n_o$  is the particular moles of oxygen provided to the reservoir, where its maximal amount,  $\max\{n_o\}$ , is the outer upper integral bound, and where T is temperature.

As an example, we will use Ti2O, TiO, TiO2, TaMo, TaW, and HEA0. The phase fraction data generated are discrete points, therefore we analytically solve the oxygen integral the *sklearn.metrics.auc function*. Resulting in the following table of values.

$$AUC_{XA} = \int_0^{\max\{n_o\}} X_A(T, n_o) dn \quad \text{with}$$

**Supplementary Table 3:** The AUC scores of selected phases

| T[K] | Ti2O1 | Ti1O1 | Ti1O2 | Ta1Mo1 | Ta1W1 | HEA0 |
|------|-------|-------|-------|--------|-------|------|
|------|-------|-------|-------|--------|-------|------|

|      |        |         |         |         |         |        |
|------|--------|---------|---------|---------|---------|--------|
| 300  | 4.4549 | 1.7676  | 12.5742 | 12.5592 | 0.0000  | 0.0000 |
| 400  | 4.4549 | 1.7676  | 12.3247 | 12.3662 | 0.0000  | 0.0000 |
| 500  | 4.4549 | 1.7676  | 12.3247 | 12.2161 | 0.0000  | 0.0000 |
| 600  | 4.4549 | 1.7676  | 12.3247 | 12.0811 | 0.0000  | 0.0000 |
| 700  | 5.6276 | 1.7676  | 11.7661 | 11.9917 | 0.0000  | 0.7326 |
| 800  | 4.9785 | 1.7676  | 11.7661 | 7.1847  | 0.0000  | 2.4552 |
| 900  | 4.9785 | 1.7676  | 11.9594 | 7.1847  | 0.0000  | 2.4552 |
| 1000 | 4.9785 | 1.7676  | 11.9594 | 7.1847  | 0.0000  | 2.4552 |
| 1100 | 4.9785 | 1.7676  | 11.9594 | 7.1847  | 0.0000  | 2.4552 |
| 1200 | 0.0000 | 10.0136 | 11.9594 | 6.3292  | 0.0000  | 2.6095 |
| 1300 | 0.0000 | 10.0136 | 13.7407 | 0.0000  | 6.3292  | 2.6095 |
| 1400 | 0.0000 | 10.0136 | 13.7407 | 0.0000  | 6.3292  | 2.6095 |
| 1500 | 0.0000 | 10.0136 | 12.4313 | 0.0000  | 6.3292  | 2.6095 |
| 1600 | 0.0000 | 10.0136 | 14.0474 | 0.0000  | 6.3292  | 2.6095 |
| 1700 | 0.0000 | 0.0000  | 14.0474 | 0.0000  | 7.5726  | 3.4342 |
| 1800 | 0.0000 | 0.0000  | 14.0474 | 0.0000  | 7.5726  | 3.4342 |
| 1900 | 0.0000 | 0.0000  | 14.0474 | 0.0000  | 12.2918 | 2.7423 |
| 2000 | 0.0000 | 0.0000  | 14.0474 | 0.0000  | 12.2918 | 2.7423 |

Consider the Ti-O chemical system phases, the Ti<sub>2</sub>O, TiO, and TiO<sub>2</sub> represent magnelli phases of increasing oxide weight fraction relative to their metallic counterpart. From the three columns we observe that at lower temperatures, metallic heavy oxides are thermodynamically favorable evident by their greater AUC score. However, as temperature increases these oxides fall away in favor of more stable, oxide dense relatives.

Next consider the intermetallic phases, TaMo is present at low temperatures but slowly disappears at increasing temperature while TaW begins to form at similar rate. This informs that TaW is more effective at reducing energy at high temperatures but is virtually non-existent at low temperatures. Finally, is the desired HEAO which has zero formation to 600K and steadily increase formation after that point as graphically represented in Figure 10 in the main text.

$$AUC_{XA}^2 = \int_0^{\max\{T\}} AUC_{XA}(T) dt$$

Completing the second Integral over the temperature space gives the final AUC<sup>2</sup> result of each discussed phase.

**Supplementary Table 4:** The AUC<sup>2</sup> scores of selected phases

| <i>Phase</i>  | <i>AUC<sup>2</sup></i> |
|---------------|------------------------|
| <i>Ti2O1</i>  | 4113.371               |
| <i>Ti1O1</i>  | 6509.274               |
| <i>Ti1O2</i>  | 21775.7                |
| <i>Ta1Mo1</i> | 9000.253               |
| <i>Ta1W1</i>  | 5889.969               |
| <i>HEAO</i>   | 3458.265               |

These numerical values are a rapid means to compare across the different HEA candidates shown graphically in Figure 13 and illustrate that certain HEA compositions will have more or less than others and yield varying amounts of competing intermetallic and oxide phases.

**Supplementary Table 3:** The AUC scores of selected phases

| <b>Compound</b>                          | <b>Prototype</b>                         | <b>Space group</b>             |
|------------------------------------------|------------------------------------------|--------------------------------|
| TiO <sub>2</sub>                         | Rutile                                   | <i>P4<sub>2</sub>/mnm</i>      |
| Ti <sub>2</sub> O <sub>3</sub>           | $\alpha$ -Al <sub>2</sub> O <sub>3</sub> | <i>R<math>\bar{3}c</math></i>  |
| Ti <sub>3</sub> O <sub>5</sub>           | Anosovite                                | <i>C2/m</i>                    |
| TiO                                      | NaCl                                     | <i>Fm<math>\bar{3}m</math></i> |
| Ti <sub>2</sub> O                        | Anti-CdI <sub>2</sub>                    | <i>P<math>\bar{3}m1</math></i> |
| Ti <sub>3</sub> O                        | Ti <sub>3</sub> O                        | <i>P312</i>                    |
| Ti <sub>6</sub> O                        | Ti <sub>6</sub> O                        | <i>P<math>\bar{3}1c</math></i> |
| $\alpha$ -Al <sub>2</sub> O <sub>3</sub> | $\alpha$ -Al <sub>2</sub> O <sub>3</sub> | <i>R<math>\bar{3}c</math></i>  |
